# Supplementary material for: Proton affinity and gas phase basicity of diamandoid molecules: diamantane to C131H116
Source: Royal Society of Chemistry journal article supplement (doi:10.1039/d1cp04177k), 2022-01-01
Supplement: d1cp04177k1.pdf [file d1cp04177k1.pdf]

*Supplemental Information for*

**Proton affinity and gas phase basicity of diamondoid molecules: diamantane  
to C<sub>131</sub>H<sub>116</sub>**

Dulce C. Camacho-Mojica,<sup>1</sup> Jeong-Kwon Ha,<sup>2</sup> Seung Kyu Min,<sup>1,2</sup> Robert Vianello,<sup>3</sup> Rodney S.  
Ruoff<sup>1,2,4,5 \*</sup>

<sup>1</sup>Center for Multidimensional Carbon Materials (CMCM), Institute for Basic Science (IBS), Ulsan 44919, Republic of Korea.

<sup>2</sup>Department of Chemistry, Ulsan National Institute of Science and Technology (UNIST), Ulsan 44919, Republic of Korea.

<sup>3</sup>Laboratory for the Computational Design and Synthesis of Functional Materials, Division of Organic Chemistry and Biochemistry, Ruđer Bošković Institute, 10 000 Zagreb, Croatia.

<sup>4</sup>Department Materials Science and Engineering, Ulsan National Institute of Science and Technology (UNIST), Ulsan 44919, Republic of Korea.

<sup>5</sup>School of Chemical Engineering and Energy Science, Ulsan National Institute of Science and Technology (UNIST), Ulsan 44919, Republic of Korea.

\*Corresponding author:

[rsruoff@ibs.re.kr](mailto:rsruoff@ibs.re.kr), [ruofflab@gmail.com](mailto:ruofflab@gmail.com)

## Content

**Discussion S1. Benchmarking: adamantane, dodecahedrane, cyclohexane**

**Table S1. Benchmarking, adamantane**

**Figures S1 to S3. Electron density of selected neutral and “protonated” diamondoid molecules**

**Discussion S2. Three isomers of  $C_{14}H_{19}^+$  and comparison with Olah and Lukas experimental data, specifically their published NMR spectrum [1].**

**Table S2. Calculated proton NMR peak positions of the  $C_{14}H_{19}^+$  structure (a)**

**Figure S5. Proton NMR spectrum of  $C_{14}H_{19}^+$  structure (a)**

**Table S3. Calculated proton NMR peak positions of the  $C_{14}H_{19}^+$  structure (b)**

**Figure S6. Proton NMR spectrum of  $C_{14}H_{19}^+$  structure (b)**

**Table S4. Calculated proton NMR peak positions of the  $C_{14}H_{19}^+$  structure (c)**

**Figure S7. Proton NMR spectrum of  $C_{14}H_{19}^+$  structure (c)**

**Figure S8. Proton NMR spectrum of  $C_{14}H_{19}^+$  structures (a), (b), and (c) together**

**XYZ files [last column corresponds to the Bader charges (e)]**

**References.**

### Discussion S1. Benchmarking: adamantane, dodecahedrane, cyclohexane

**Adamantane:** We have found one structure with stoichiometry  $C_{10}H_{17}^+$  where the added proton is closer to the secondary carbon and farther from the tertiary as well as two isomers with stoichiometry  $C_{10}H_{15}^+$  and a  $H_2$  molecule, been the tertiary isomer the most favorable according to its GPB.

**Table S1.** Adamantane monoprotonated (N=1) molecules. Our calculated values, and experimental values and values from other theoretical studies.

|                                        | $C_{10}H_{17}^+$ | $C_{10}H_{15}^+ + H_2$<br>tertiary | $C_{10}H_{15}^+ + H_2$<br>secondary |
|----------------------------------------|------------------|------------------------------------|-------------------------------------|
| GPB <sub>0-1</sub> (eV)                | 7.3              | 7.89                               | 7.41                                |
| PA <sub>0-1</sub> (eV)                 | 7.54             | 7.73                               | 7.28                                |
| PA <sub>0-1</sub> (eV) experimental    |                  | 7.43 <sup>[2,3]</sup>              | 7.01 <sup>[2,4]</sup>               |
| GPB <sub>0-1</sub> (eV) <sup>[5]</sup> |                  | 7.54                               | 7.12                                |
| PA <sub>0-1</sub> (eV) <sup>[5]</sup>  |                  | 7.44                               | 6.9                                 |
| PA <sub>0-1</sub> (eV) <sup>[6]</sup>  | 7.21             | 7.62                               | 7.11                                |

**Dodecahedrane:** The reported experimental values according to ref <sup>[7]</sup> are 8.47 eV for GPB and 8.74 eV for PA. Chen et al. <sup>[8]</sup> reported a theoretical value of 8.03 eV for PA. We calculated values of 8.02 eV for GPB and 8.33 eV for PA.

**Cyclohexane:** The reported experimental values according to ref <sup>[9]</sup> are 6.91 eV for GPB and 7.12 eV for PA. To the best of our knowledge, theoretical values for PA and/or GPB for cyclohexane have not been reported. We calculated values of 6.81 eV for GPB and 7.08 eV for PA .

Diamantane ( $C_{14}H_{20}$ )

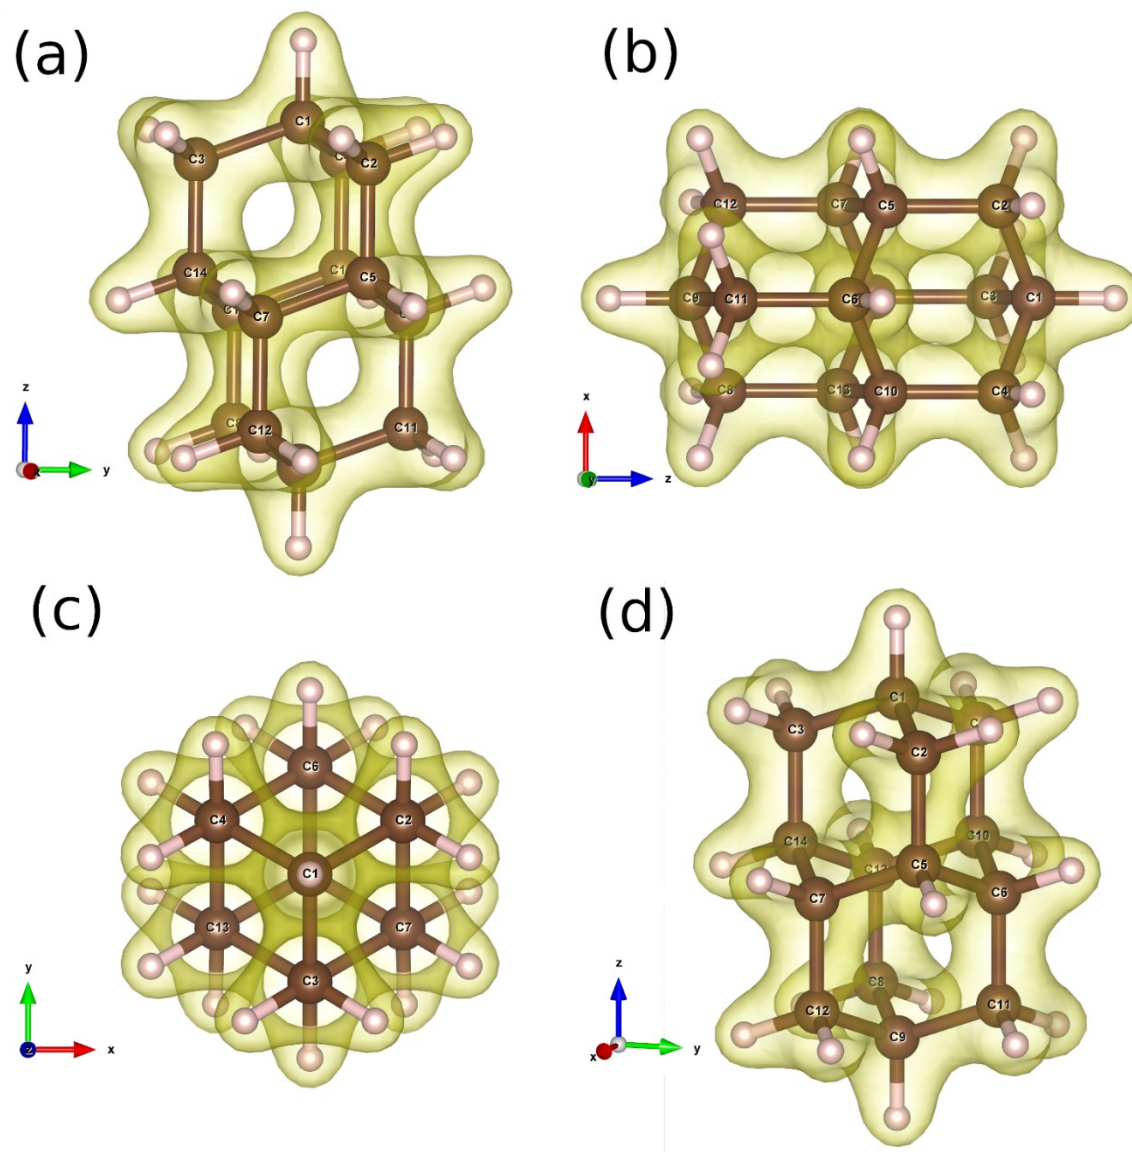

**Figure S1.** Diamantane  $C_{14}H_{20}$  electron density viewed (a) to (d) in different directions at an 0.080  $eV/Bohr^3$  isosurface.

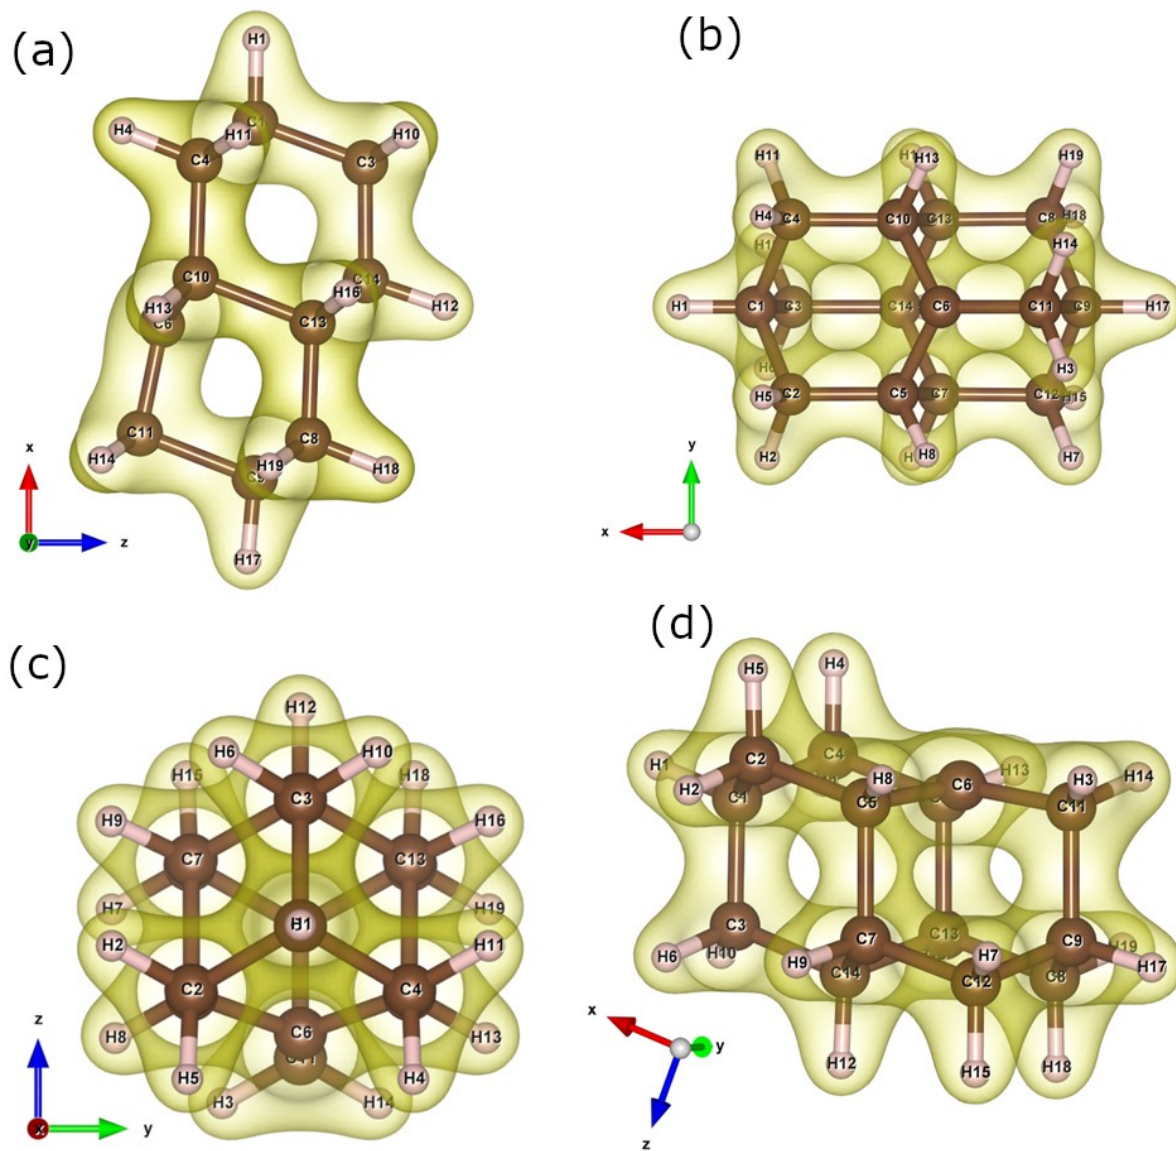

**Figure S2.**  $C_{14}H_{19}^+$ . electron density viewed (a) to (d) in different directions at an  $0.080 \text{ eV/Bohr}^3$  (A.U.) isosurface.

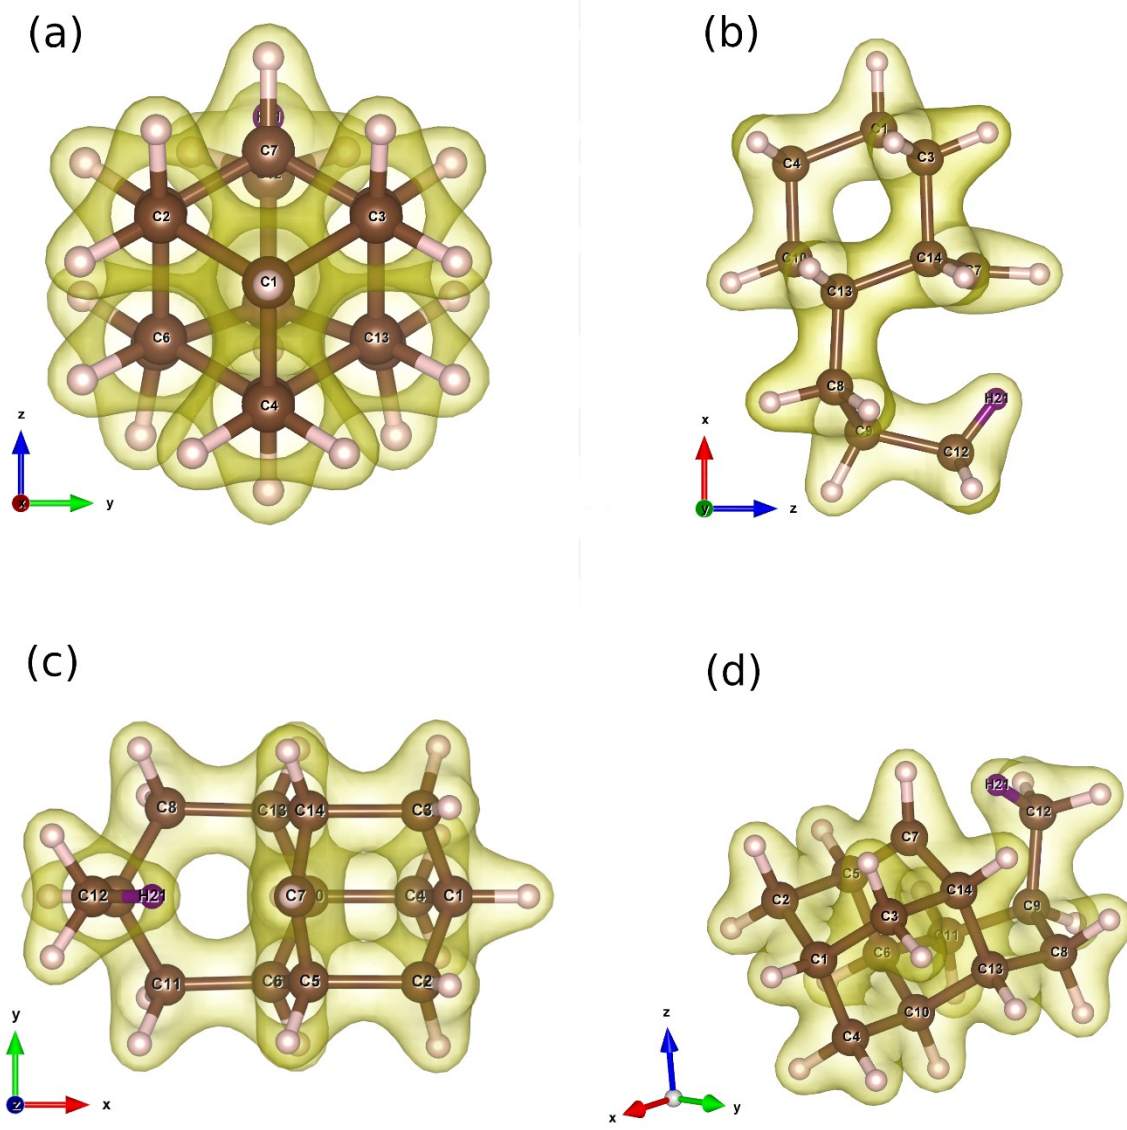

Figure S3.  $C_{14}H_{21}^+$  Electron density viewed (a) to (d) in different directions at an isosurface of 0.080 A.U.

### Discussion S2. Three isomers of $C_{14}H_{19}^+$

We found 3 isomers of  $C_{14}H_{19}^+$  (see **figure S31**): **(a)** corresponds to the structure proposed by Olah and Lukas [1]. The most stable structure according to our calculations is **(a)**. Structure **(c)** is 0.47 eV less stable than **(a)** and structure **(b)** is 0.14 eV less stable than **(a)**.

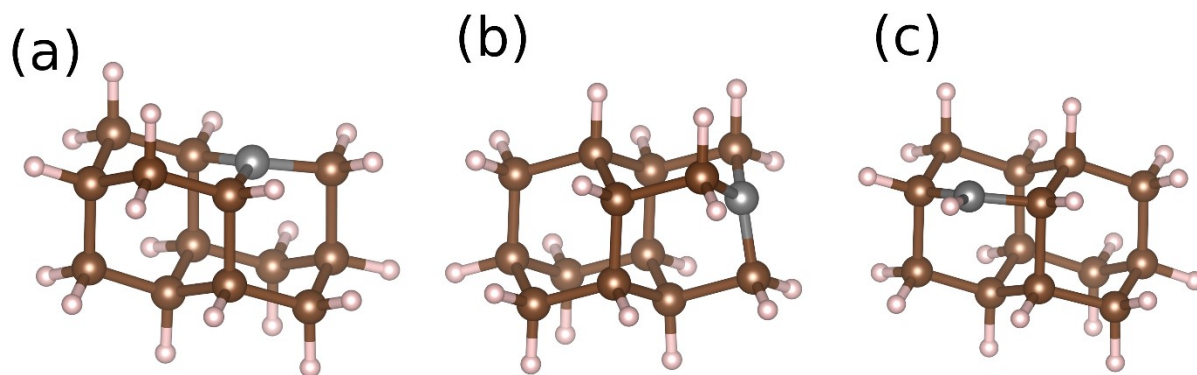

**Figure S4**  $C_{14}H_{19}^+$  structures. H atoms are pink, C atoms brown, and the gray C atom had its H atom “abstracted” by the proton to form  $H_2(g)$ .

We calculated (see supplementary file  $C_{14}H_{19}^+.xyz$  fourth column for the Bader charge analysis) that the positive charge is delocalized around all the H centers, while the C centers are almost neutral or with a slightly negative charge.

We calculated the NMR spectra for the three structures **(a-c)** using the recommended scaling factors of Tantillo et al [10] at the level of B3LYP/6-311+G(2d,p). The results are shown in **tables S2, S3, and S4** and **figures S5, S6, S7, and S8**. Our calculated NMR spectra for the 3 different  $C_{14}H_{19}^+$  isomers ('structures'), show that **(a)** and **(c)** are reasonably good matches with the experimental NMR spectrum published by Olah and Lukas in 1968 [1]. Their published spectrum is a solution phase NMR spectrum and counteranions and/or solvent molecules might play some role in both chemical shifts and peak intensities; in this regard we suggest it is perhaps interesting that the calculated spectra of **(a)** and **(c)** agree as well as they do. Given that the calculated *GPB* values are reasonably close, we suggest the *possibility* that the "hydride abstraction reaction" as proposed by Olah and Lukas, could have happened at several different locations on the diamondane molecule in the magic acid solution and under the conditions used. Or perhaps on the time scale relevant to the NMR spectrum acquired and published by Olah and Lukas [1] there is no interconversion between some or all 3 of the ‘inequivalent isomers’ we have calculated, if indeed interconversion is happening,.

We note that Olah and Lukas referred to the cation  $C_{14}H_{19}^+$  as a "carbonium ion" [1] but according to our calculated structures and Bader charges showing extensive charge delocalization, the IUPAC guideline [11] causes us to refer to such products as a "monocation", and more specifically, as  $C_{14}H_{19}^+$ . Indeed, we have referred to all the positively charged ions that are products of calculated protonation reactions as "cations," and indicated whether there is uptake of an additional H atom, or "subtraction" of an H atom to form  $H_2(g)$  as in the case of diamantane:  $C_{14}H_{21}^+$  *or*  $C_{14}H_{19}^+ + H_2(g)$ .

**Table S2. NMR  $C_{14}H_{19}^+$  structure (a)**

|  | <b>atom</b> | <b>ppm</b> |  | <b>atom</b> | <b>ppm</b> |
|--|-------------|------------|--|-------------|------------|
|  | 3 H         | 0.171      |  | 1 C         | 24.638     |
|  | 7 H         | 0.171      |  | 3 C         | 32.742     |
|  | 15 H        | 0.412      |  | 4 C         | 32.742     |
|  | 16 H        | 0.412      |  | 12 C        | 36.088     |
|  | 8 H         | 0.421      |  | 11 C        | 36.088     |
|  | 2 H         | 0.533      |  | 2 C         | 36.401     |
|  | 5 H         | 0.533      |  | 5 C         | 40.771     |
|  | 1 H         | 0.601      |  | 8 C         | 64.305     |
|  | 4 H         | 0.615      |  | 14 C        | 74.479     |
|  | 6 H         | 0.615      |  | 10 C        | 74.479     |
|  | 11 H        | 0.899      |  | 9 C         | 91.739     |
|  | 12 H        | 0.899      |  | 7 C         | 105.755    |
|  | 18 H        | 2.056      |  | 6 C         | 105.755    |
|  | 19 H        | 2.056      |  | 13 C        | 307.016    |
|  | 13 H        | 2.636      |  |             |            |
|  | 14 H        | 2.636      |  |             |            |
|  | 17 H        | 3.292      |  |             |            |
|  | 9 H         | 3.476      |  |             |            |
|  | 10 H        | 3.476      |  |             |            |



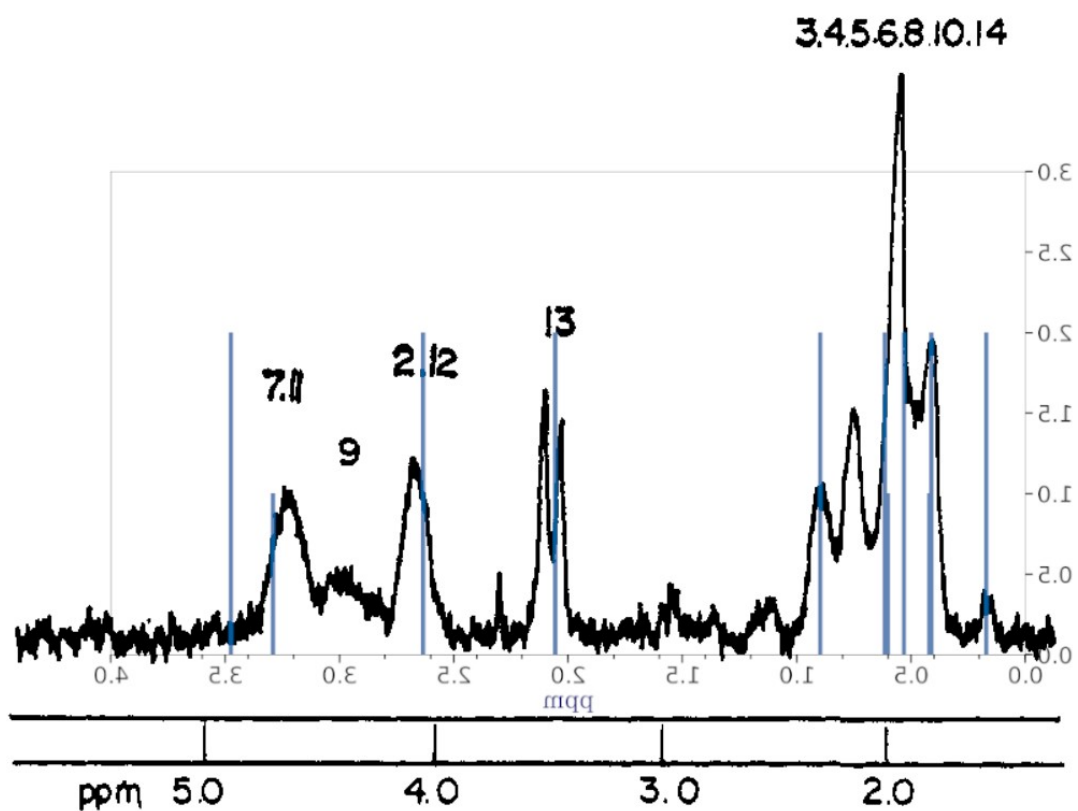

**Figure S5.** Proton NMR spectra for  $C_{14}H_{19}^+$  **structure (a)** shown in blue; in reasonable agreement with the NMR spectrum in Figure 5 of reference [1] that is reproduced here in black color.

**Table S3. NMR C<sub>14</sub>H<sub>19</sub><sup>+</sup> structure (b)**

|  | <b>atom</b> | <b>ppm</b> |  | <b>atom</b> | <b>ppm</b> |
|--|-------------|------------|--|-------------|------------|
|  | 1 H         | 0.352      |  | 1 C         | 23.306     |
|  | 12 H        | 0.460      |  | 4 C         | 31.790     |
|  | 11 H        | 0.464      |  | 2 C         | 32.028     |
|  | 5 H         | 0.464      |  | 3 C         | 32.241     |
|  | 4 H         | 0.465      |  | 14 C        | 42.679     |
|  | 6 H         | 0.481      |  | 10 C        | 42.842     |
|  | 2 H         | 0.482      |  | 5 C         | 42.918     |
|  | 14 H        | 0.891      |  | 12 C        | 64.474     |
|  | 8 H         | 0.912      |  | 8 C         | 64.531     |
|  | 13 H        | 0.919      |  | 11 C        | 64.702     |
|  | 15 H        | 2.188      |  | 7 C         | 105.514    |
|  | 3 H         | 2.193      |  | 6 C         | 105.751    |
|  | 19 H        | 2.193      |  | 13 C        | 105.793    |
|  | 16 H        | 2.195      |  | 9 C         | 309.230    |
|  | 7 H         | 2.197      |  |             |            |
|  | 18 H        | 2.198      |  |             |            |
|  | 17 H        | 3.450      |  |             |            |
|  | 10 H        | 3.454      |  |             |            |
|  | 9 H         | 3.462      |  |             |            |

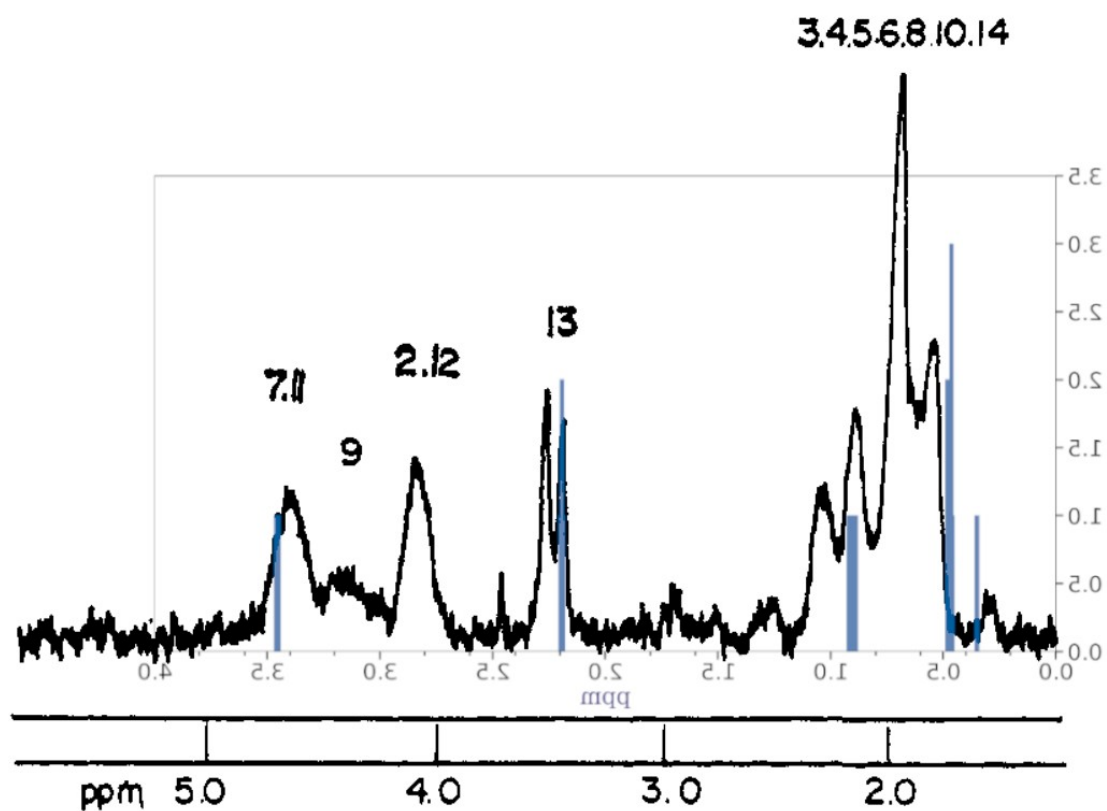

**Figure S6.** Proton NMR spectra for  $C_{14}H_{19}^+$  **structure (b)** in blue. We find this to have a relatively poor agreement with the NMR spectrum in Figure 5 of reference [1] that is reproduced here in black.

**Table S4. NMR  $C_{14}H_{19}^+$  structure (c)**

|    | <b>atom</b> | <b>ppm</b> |    | <b>atom</b> | <b>ppm</b> |
|----|-------------|------------|----|-------------|------------|
| 12 | H           | 0.314      | 1  | C           | 23.705     |
| 10 | H           | 0.357      | 4  | C           | 32.091     |
| 2  | H           | 0.449      | 2  | C           | 32.953     |
| 5  | H           | 0.537      | 11 | C           | 34.771     |
| 4  | H           | 0.562      | 6  | C           | 37.140     |
| 9  | H           | 0.591      | 5  | C           | 38.626     |
| 11 | H           | 0.618      | 7  | C           | 40.670     |
| 8  | H           | 0.628      | 10 | C           | 40.990     |
| 1  | H           | 0.705      | 3  | C           | 41.114     |
| 3  | H           | 0.767      | 9  | C           | 60.725     |
| 15 | H           | 0.873      | 12 | C           | 72.259     |
| 6  | H           | 1.184      | 13 | C           | 89.492     |
| 14 | H           | 1.301      | 14 | C           | 102.386    |
| 16 | H           | 1.808      | 8  | C           | 282.223    |
| 7  | H           | 2.222      |    |             |            |
| 18 | H           | 2.532      |    |             |            |
| 13 | H           | 3.083      |    |             |            |
| 17 | H           | 3.115      |    |             |            |
| 19 | H           | 10.903     |    |             |            |

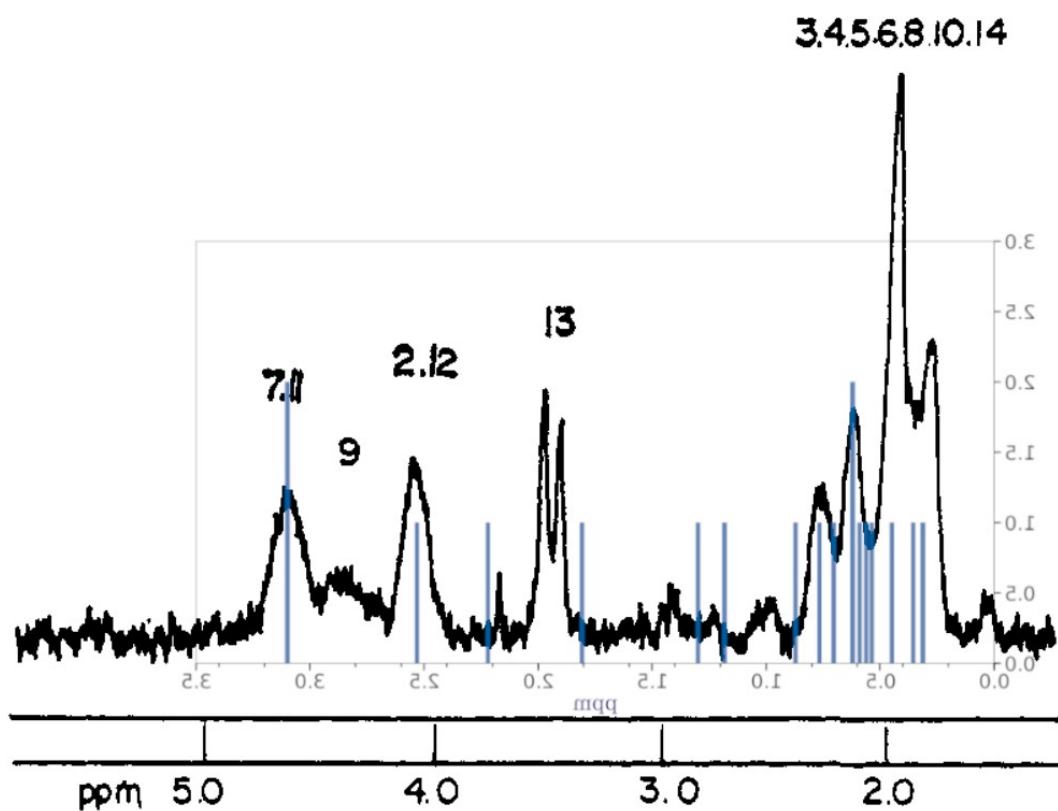

**Figure S7.** Proton NMR spectra for  $C_{14}H_{19}^+$  **structure c**, in relatively good agreement with the NMR spectrum in Figure 5 of reference [1] that is reproduced here.

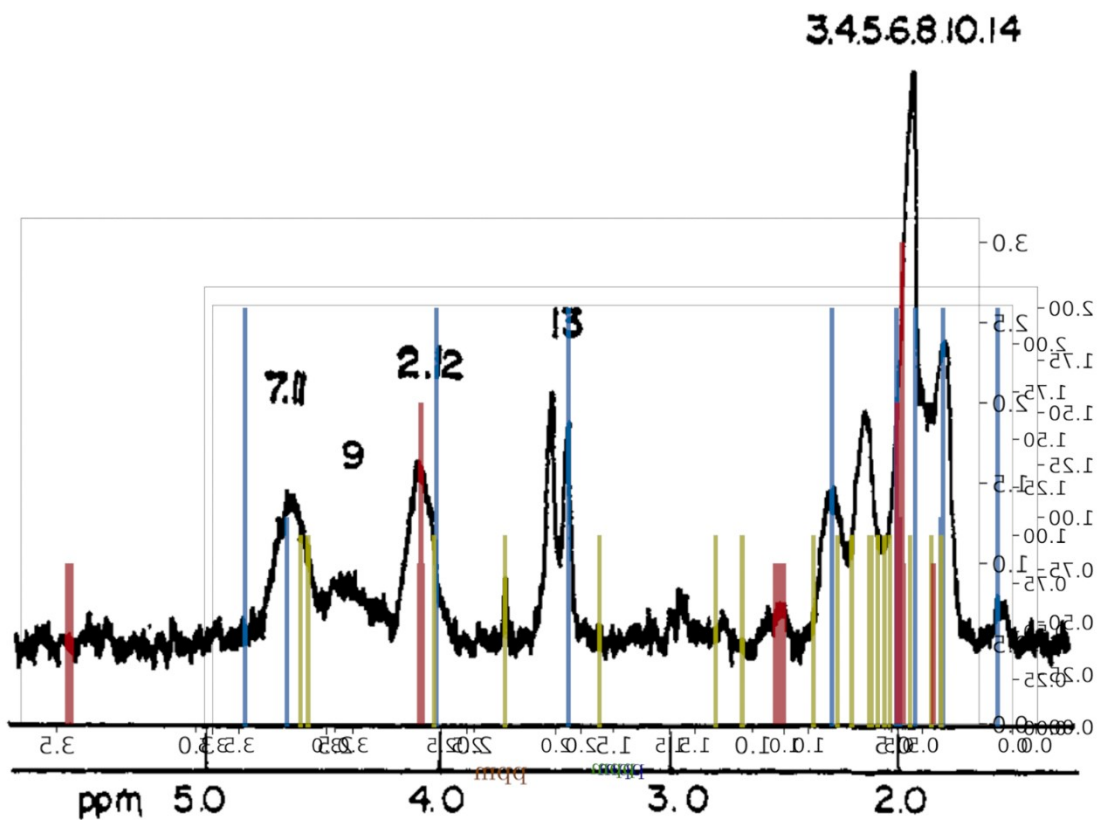

**Figure S8.** Proton NMR spectra for  $C_{14}H_{19}^+$  **structure (a)** in blue, **structure (b)** in red and **structure (c)** in yellow. The NMR spectrum in Figure 5 of reference [1] is reproduced here. The concept of this figure is to show the possibility that 2 or even all 3 of the  $C_{14}H_{19}^+$  isomers might have been produced by Olah and Lukas, although the authors assigned this NMR spectrum as being due to only structure (a).

XYZ files. The last column corresponds to the Bader charges (e units)

34

diamantane C14H20

|   |          |          |          |   |        |
|---|----------|----------|----------|---|--------|
| C | 4.709485 | 4.904885 | 8.127558 | # | 0.064  |
| C | 5.971390 | 5.633203 | 7.605239 | # | -0.032 |
| C | 4.709275 | 3.447884 | 7.605239 | # | -0.027 |
| C | 3.447790 | 5.633568 | 7.605239 | # | -0.034 |
| C | 5.972570 | 5.634127 | 6.059451 | # | 0.069  |
| C | 4.709486 | 6.363369 | 5.514507 | # | 0.010  |
| C | 5.972569 | 4.175642 | 5.514507 | # | 0.021  |
| C | 3.447580 | 4.176567 | 3.968718 | # | -0.003 |
| C | 4.709485 | 4.904885 | 3.446400 | # | 0.047  |
| C | 3.446401 | 5.634128 | 6.059451 | # | 0.057  |
| C | 4.709695 | 6.361886 | 3.968718 | # | -0.002 |
| C | 5.971179 | 4.176202 | 3.968718 | # | -0.002 |
| C | 3.446400 | 4.175642 | 5.514507 | # | 0.016  |
| C | 4.709485 | 3.446400 | 6.059451 | # | 0.056  |
| H | 4.709485 | 4.904885 | 9.226847 | # | -0.029 |
| H | 6.877380 | 5.134434 | 7.980271 | # | -0.007 |
| H | 5.594637 | 6.897111 | 3.593686 | # | -0.007 |
| H | 3.426742 | 6.667562 | 7.980271 | # | -0.007 |
| H | 5.992685 | 6.666996 | 7.980890 | # | -0.007 |
| H | 5.593918 | 2.912545 | 7.980890 | # | -0.008 |
| H | 6.877118 | 4.674657 | 3.593068 | # | -0.007 |
| H | 6.872125 | 6.153397 | 5.693079 | # | -0.022 |
| H | 4.709562 | 7.402042 | 5.880879 | # | -0.009 |
| H | 6.872048 | 3.656240 | 5.880879 | # | -0.016 |
| H | 3.824333 | 2.912658 | 7.980271 | # | -0.012 |
| H | 2.541852 | 5.135113 | 7.980890 | # | -0.010 |
| H | 4.709408 | 2.407728 | 5.693079 | # | -0.016 |
| H | 2.546922 | 6.153530 | 5.693079 | # | -0.016 |
| H | 3.825052 | 6.897224 | 3.593068 | # | -0.011 |
| H | 5.992228 | 3.142207 | 3.593686 | # | -0.003 |
| H | 2.546845 | 3.656373 | 5.880879 | # | -0.015 |
| H | 4.709485 | 4.904885 | 2.347111 | # | -0.016 |
| H | 3.426285 | 3.142774 | 3.593068 | # | -0.003 |
| H | 2.541590 | 4.675335 | 3.593686 | # | -0.011 |

33

Diamantane C14H19 +

|   |          |          |          |   |        |
|---|----------|----------|----------|---|--------|
| C | 8.142756 | 4.714597 | 4.973487 | # | 0.030  |
| C | 7.637531 | 3.456811 | 4.233491 | # | 0.047  |
| C | 7.610477 | 4.714597 | 6.425700 | # | -0.031 |
| C | 7.637531 | 5.972383 | 4.233491 | # | 0.051  |
| C | 6.094857 | 3.462814 | 4.184742 | # | -0.124 |
| C | 5.475199 | 4.714597 | 3.738629 | # | 0.078  |

|   |          |          |          |          |
|---|----------|----------|----------|----------|
| C | 5.496958 | 3.458849 | 5.728947 | # -0.007 |
| C | 3.959680 | 5.982794 | 5.673142 | # -0.017 |
| C | 3.446400 | 4.714597 | 4.965842 | # 0.044  |
| C | 6.094857 | 5.966380 | 4.184742 | # -0.125 |
| C | 4.039102 | 4.714597 | 3.446400 | # -0.044 |
| C | 3.959680 | 3.446400 | 5.673142 | # -0.007 |
| C | 5.496958 | 5.970345 | 5.728947 | # -0.013 |
| C | 6.062216 | 4.714597 | 6.432929 | # 0.026  |
| H | 9.238915 | 4.714597 | 4.985373 | # 0.057  |
| H | 7.972201 | 2.545828 | 4.743466 | # 0.044  |
| H | 3.687558 | 3.815990 | 2.935058 | # 0.085  |
| H | 8.038694 | 6.014258 | 3.213367 | # 0.050  |
| H | 8.038694 | 3.414936 | 3.213367 | # 0.051  |
| H | 7.980914 | 3.833344 | 6.964812 | # 0.032  |
| H | 3.600633 | 2.544218 | 5.163105 | # 0.048  |
| H | 5.679138 | 2.583489 | 3.684135 | # 0.088  |
| H | 5.892087 | 2.538070 | 6.173997 | # 0.069  |
| H | 7.980914 | 5.595850 | 6.964812 | # 0.028  |
| H | 7.972201 | 6.883367 | 4.743466 | # 0.040  |
| H | 5.711408 | 4.714597 | 7.475084 | # 0.061  |
| H | 5.679138 | 6.845705 | 3.684135 | # 0.095  |
| H | 3.687558 | 5.613204 | 2.935058 | # 0.079  |
| H | 3.557276 | 3.407933 | 6.693822 | # 0.058  |
| H | 5.892087 | 6.891124 | 6.173997 | # 0.074  |
| H | 2.356023 | 4.714597 | 4.868890 | # 0.035  |
| H | 3.557276 | 6.021262 | 6.693822 | # 0.058  |
| H | 3.600633 | 6.884976 | 5.163105 | # 0.048  |

35

Diamantane C<sub>14</sub>H<sub>21</sub> +

|   |          |          |          |          |
|---|----------|----------|----------|----------|
| C | 8.722116 | 4.739603 | 4.882843 | # 0.057  |
| C | 8.259361 | 3.487226 | 5.639741 | # -0.006 |
| C | 8.259363 | 5.991991 | 5.639726 | # -0.006 |
| C | 8.155086 | 4.739595 | 3.446400 | # 0.008  |
| C | 6.616751 | 3.491676 | 5.697117 | # -0.033 |
| C | 6.068573 | 3.490407 | 4.234591 | # 0.035  |
| C | 6.412660 | 4.739611 | 6.406619 | # 0.045  |
| C | 4.522872 | 6.032804 | 4.161005 | # 0.012  |
| C | 3.787983 | 4.739605 | 4.626101 | # 0.052  |
| C | 6.613090 | 4.739597 | 3.497028 | # 0.027  |
| C | 4.522869 | 3.446401 | 4.161014 | # 0.010  |
| C | 3.446400 | 4.739611 | 6.133270 | # -0.040 |
| C | 6.068576 | 5.988795 | 4.234579 | # 0.034  |
| C | 6.616757 | 5.987539 | 5.697105 | # -0.032 |
| H | 9.821998 | 4.739601 | 4.852257 | # 0.050  |
| H | 8.672405 | 3.438507 | 6.652944 | # 0.045  |



|   |          |          |          |          |
|---|----------|----------|----------|----------|
| H | 4.140883 | 2.583062 | 4.722418 | # 0.020  |
| H | 8.515259 | 3.858131 | 2.901032 | # 0.024  |
| H | 8.510939 | 2.553626 | 5.124753 | # 0.074  |
| H | 8.672410 | 6.040719 | 6.652928 | # 0.046  |
| H | 2.862405 | 3.851320 | 6.399674 | # 0.043  |
| H | 6.310121 | 2.613466 | 6.272213 | # 0.072  |
| H | 6.457210 | 2.581470 | 3.755833 | # 0.022  |
| H | 6.361050 | 4.739616 | 7.497172 | # 0.119  |
| H | 8.510943 | 6.925582 | 5.124726 | # 0.073  |
| H | 8.515261 | 5.621053 | 2.901022 | # 0.024  |
| H | 6.310127 | 6.865755 | 6.272193 | # 0.072  |
| H | 6.222082 | 4.739592 | 2.471050 | # 0.031  |
| H | 4.269273 | 3.258617 | 3.108999 | # 0.026  |
| H | 2.862416 | 5.627909 | 6.399670 | # 0.044  |
| H | 6.457214 | 6.897727 | 3.755813 | # 0.022  |
| H | 2.815881 | 4.739604 | 4.115282 | # 0.026  |
| H | 4.140888 | 6.896146 | 4.722401 | # 0.018  |
| H | 4.269276 | 6.220578 | 3.108988 | # 0.025  |
| H | 4.323973 | 4.739606 | 6.801900 | # -0.042 |

36

Diamantane C<sub>14</sub>H<sub>22</sub> 2+

|   |          |          |          |          |
|---|----------|----------|----------|----------|
| C | 7.105021 | 7.954766 | 4.744715 | # 0.034  |
| C | 6.440365 | 7.631758 | 6.043030 | # -0.025 |
| C | 6.440365 | 7.631758 | 3.446400 | # -0.028 |
| C | 8.559055 | 5.897762 | 4.744715 | # -0.017 |
| C | 5.565089 | 6.347895 | 6.003155 | # 0.025  |
| C | 6.440365 | 5.053270 | 6.003155 | # 0.041  |
| C | 4.648195 | 6.442955 | 4.744715 | # 0.036  |
| C | 5.565089 | 3.769406 | 3.446400 | # -0.015 |
| C | 4.900434 | 3.446400 | 4.744715 | # 0.026  |
| C | 7.357259 | 4.958210 | 4.744715 | # 0.025  |
| C | 5.565089 | 3.769406 | 6.043030 | # -0.017 |
| C | 3.446400 | 5.503403 | 4.744715 | # -0.021 |
| C | 6.440365 | 5.053270 | 3.486275 | # 0.038  |
| C | 5.565089 | 6.347895 | 3.486275 | # 0.025  |
| H | 7.821475 | 8.784350 | 4.744715 | # 0.160  |
| H | 5.794129 | 8.511374 | 6.243486 | # 0.118  |
| H | 4.846567 | 3.767160 | 6.871505 | # 0.100  |
| H | 9.174066 | 5.825256 | 5.648027 | # 0.111  |
| H | 7.158886 | 7.634004 | 6.871505 | # 0.095  |
| H | 5.794129 | 8.511374 | 3.245944 | # 0.116  |
| H | 2.831388 | 5.575911 | 5.648027 | # 0.113  |
| H | 4.951912 | 6.345956 | 6.912986 | # 0.050  |
| H | 7.053542 | 5.055209 | 6.912987 | # 0.044  |
| H | 4.186523 | 7.444516 | 4.744715 | # 0.044  |

|   |          |          |          |   |        |
|---|----------|----------|----------|---|--------|
| H | 7.158886 | 7.634004 | 2.617925 | # | 0.096  |
| H | 9.174066 | 5.825256 | 3.841403 | # | 0.114  |
| H | 4.951912 | 6.345956 | 2.576444 | # | 0.049  |
| H | 7.818932 | 3.956649 | 4.744715 | # | 0.050  |
| H | 6.211325 | 2.889790 | 6.243486 | # | 0.115  |
| H | 2.831388 | 5.575911 | 3.841403 | # | 0.110  |
| H | 7.053542 | 5.055209 | 2.576443 | # | 0.047  |
| H | 4.183980 | 2.616815 | 4.744715 | # | 0.159  |
| H | 4.846567 | 3.767160 | 2.617925 | # | 0.099  |
| H | 6.211325 | 2.889790 | 3.245944 | # | 0.116  |
| H | 3.735637 | 4.382416 | 4.744715 | # | -0.027 |
| H | 8.269816 | 7.018749 | 4.744715 | # | -0.032 |

42

Triamantane C<sub>18</sub>H<sub>24</sub>

|   |          |          |          |   |        |
|---|----------|----------|----------|---|--------|
| C | 8.535240 | 5.970504 | 6.137191 | # | 0.002  |
| C | 3.448126 | 3.446419 | 6.137191 | # | -0.001 |
| C | 7.275936 | 5.969513 | 5.241726 | # | 0.023  |
| C | 4.707430 | 3.447410 | 5.241726 | # | 0.026  |
| C | 5.991683 | 5.969077 | 6.114844 | # | 0.015  |
| C | 5.991683 | 3.447847 | 6.114844 | # | 0.002  |
| C | 5.991683 | 4.708462 | 7.043570 | # | 0.037  |
| C | 7.268035 | 4.708460 | 7.916656 | # | -0.006 |
| C | 4.715331 | 4.708463 | 7.916656 | # | -0.013 |
| C | 8.536966 | 4.708457 | 7.032888 | # | 0.047  |
| C | 3.446400 | 4.708466 | 7.032888 | # | 0.046  |
| C | 8.535231 | 3.446400 | 6.137192 | # | 0.000  |
| C | 3.448135 | 5.970523 | 6.137192 | # | 0.000  |
| C | 7.275930 | 3.447398 | 5.241729 | # | 0.024  |
| C | 4.707436 | 5.969525 | 5.241729 | # | 0.026  |
| C | 7.255158 | 4.708451 | 4.332309 | # | 0.028  |
| C | 4.728208 | 4.708472 | 4.332309 | # | 0.032  |
| C | 5.991683 | 4.708462 | 3.446400 | # | 0.002  |
| H | 8.551440 | 6.876248 | 6.761271 | # | -0.008 |
| H | 3.431925 | 2.540675 | 6.761271 | # | -0.007 |
| H | 9.440729 | 5.991800 | 5.513079 | # | -0.010 |
| H | 2.542637 | 3.425124 | 5.513079 | # | -0.007 |
| H | 7.274961 | 6.869476 | 4.606604 | # | -0.019 |
| H | 4.708405 | 2.547447 | 4.606604 | # | -0.017 |
| H | 5.991690 | 6.869857 | 6.751443 | # | -0.026 |
| H | 5.991676 | 2.547066 | 6.751443 | # | -0.019 |
| H | 7.263266 | 5.593190 | 8.572204 | # | -0.006 |
| H | 4.720100 | 3.823733 | 8.572204 | # | -0.015 |
| H | 7.263263 | 3.823731 | 8.572195 | # | -0.015 |
| H | 4.720103 | 5.593192 | 8.572195 | # | -0.005 |
| H | 9.431851 | 4.708453 | 7.671521 | # | -0.012 |
| H | 2.551515 | 4.708471 | 7.671521 | # | -0.012 |

|   |          |          |          |   |        |
|---|----------|----------|----------|---|--------|
| H | 9.440725 | 3.425104 | 5.513083 | # | -0.008 |
| H | 2.542642 | 5.991819 | 5.513083 | # | -0.008 |
| H | 8.551432 | 2.540663 | 6.761280 | # | -0.008 |
| H | 3.431934 | 6.876260 | 6.761280 | # | -0.008 |
| H | 7.274946 | 2.547434 | 4.606609 | # | -0.017 |
| H | 4.708420 | 6.869490 | 4.606609 | # | -0.019 |
| H | 8.153111 | 4.708451 | 3.694901 | # | -0.013 |
| H | 3.830256 | 4.708472 | 3.694901 | # | -0.015 |
| H | 5.991676 | 3.824135 | 2.791513 | # | -0.008 |
| H | 5.991690 | 5.592789 | 2.791513 | # | -0.013 |

41

Triamantane C16H23 +

|   |          |          |          |   |        |
|---|----------|----------|----------|---|--------|
| C | 3.453524 | 5.224739 | 8.533951 | # | 0.020  |
| C | 5.981977 | 5.229164 | 3.446400 | # | 0.008  |
| C | 3.446400 | 6.097093 | 7.261736 | # | -0.010 |
| C | 6.003109 | 6.134439 | 4.701641 | # | 0.025  |
| C | 3.692648 | 5.383152 | 5.997928 | # | 0.006  |
| C | 6.027126 | 5.296543 | 5.997928 | # | -0.007 |
| C | 4.682034 | 4.295434 | 5.997928 | # | -0.003 |
| C | 4.714218 | 3.446400 | 7.289580 | # | 0.005  |
| C | 4.714218 | 3.446400 | 4.706275 | # | 0.005  |
| C | 4.717734 | 4.339354 | 8.546534 | # | 0.053  |
| C | 4.717734 | 4.339354 | 3.449322 | # | 0.053  |
| C | 5.981977 | 5.229164 | 8.549456 | # | 0.007  |
| C | 3.453524 | 5.224739 | 3.461905 | # | 0.020  |
| C | 6.003109 | 6.134439 | 7.294214 | # | 0.025  |
| C | 3.446400 | 6.097093 | 4.734119 | # | -0.010 |
| C | 4.771546 | 7.067307 | 7.256594 | # | 0.012  |
| C | 4.771546 | 7.067307 | 4.739262 | # | 0.013  |
| C | 4.744120 | 7.945946 | 5.997928 | # | 0.000  |
| H | 2.546211 | 4.608947 | 8.568430 | # | 0.033  |
| H | 6.884287 | 4.604500 | 3.425838 | # | 0.025  |
| H | 3.427150 | 5.878296 | 9.413813 | # | 0.026  |
| H | 6.005159 | 5.852044 | 2.543182 | # | 0.022  |
| H | 2.570804 | 6.751298 | 7.202638 | # | 0.053  |
| H | 6.909885 | 6.756300 | 4.677150 | # | 0.032  |
| H | 6.866020 | 4.588100 | 5.997928 | # | 0.043  |
| H | 3.848565 | 2.770615 | 7.294785 | # | 0.026  |
| H | 5.608620 | 2.811414 | 4.731766 | # | 0.029  |
| H | 5.608620 | 2.811414 | 7.264090 | # | 0.029  |
| H | 3.848565 | 2.770615 | 4.701070 | # | 0.025  |
| H | 4.712741 | 3.707214 | 9.442410 | # | 0.032  |
| H | 4.712741 | 3.707214 | 2.553445 | # | 0.032  |
| H | 6.005159 | 5.852044 | 9.452673 | # | 0.023  |
| H | 3.427150 | 5.878296 | 2.582043 | # | 0.026  |

|   |          |          |          |         |
|---|----------|----------|----------|---------|
| H | 6.884287 | 4.604500 | 8.570019 | # 0.025 |
| H | 2.546211 | 4.608947 | 3.427426 | # 0.033 |
| H | 6.909885 | 6.756300 | 7.318706 | # 0.032 |
| H | 2.570804 | 6.751298 | 4.793218 | # 0.054 |
| H | 4.696089 | 7.668366 | 8.170377 | # 0.051 |
| H | 4.696089 | 7.668366 | 3.825479 | # 0.051 |
| H | 5.615552 | 8.614154 | 5.997928 | # 0.045 |
| H | 3.857763 | 8.592552 | 5.997928 | # 0.038 |

43

Triamantane C<sub>16</sub>H<sub>25</sub> +

|   |           |          |          |          |
|---|-----------|----------|----------|----------|
| C | 3.891318  | 5.697365 | 3.446400 | # -0.004 |
| C | 9.058430  | 5.099933 | 6.010640 | # -0.007 |
| C | 5.294887  | 6.352849 | 3.493290 | # 0.042  |
| C | 7.911892  | 6.127454 | 5.996350 | # 0.007  |
| C | 6.462751  | 5.331959 | 3.492590 | # -0.020 |
| C | 6.462751  | 5.331959 | 5.987816 | # -0.021 |
| C | 6.655619  | 4.586361 | 4.740203 | # 0.039  |
| C | 3.813363  | 3.448133 | 4.740203 | # -0.033 |
| C | 7.584869  | 3.446400 | 4.740203 | # -0.028 |
| C | 3.446400  | 4.949737 | 4.740203 | # 0.069  |
| C | 9.001925  | 4.230040 | 4.740203 | # 0.044  |
| C | 3.891318  | 5.697365 | 6.034006 | # -0.004 |
| C | 9.058430  | 5.099933 | 3.469766 | # -0.008 |
| C | 5.294887  | 6.352849 | 5.987116 | # 0.043  |
| C | 7.911892  | 6.127454 | 3.484056 | # 0.007  |
| C | 5.427518  | 7.260532 | 4.740203 | # 0.040  |
| C | 7.945274  | 7.027675 | 4.740203 | # 0.028  |
| C | 6.765841  | 8.022703 | 4.740203 | # -0.003 |
| H | 3.820526  | 5.017148 | 2.586553 | # 0.014  |
| H | 9.005383  | 4.474278 | 6.910108 | # 0.034  |
| H | 3.177825  | 6.508934 | 3.249541 | # 0.018  |
| H | 10.019694 | 5.628270 | 6.053749 | # 0.051  |
| H | 5.408025  | 6.962967 | 2.586258 | # 0.016  |
| H | 7.896473  | 6.725710 | 6.915061 | # 0.053  |
| H | 6.452601  | 4.683604 | 2.610580 | # 0.051  |
| H | 6.452601  | 4.683603 | 6.869826 | # 0.052  |
| H | 3.402444  | 2.951038 | 3.853722 | # 0.032  |
| H | 7.522505  | 2.827135 | 5.637827 | # 0.066  |
| H | 3.402442  | 2.951037 | 5.626683 | # 0.032  |
| H | 7.522505  | 2.827135 | 3.842578 | # 0.066  |
| H | 2.347908  | 4.972323 | 4.740203 | # 0.008  |
| H | 9.783528  | 3.463311 | 4.740203 | # 0.057  |
| H | 3.177824  | 6.508934 | 6.230865 | # 0.018  |
| H | 10.019694 | 5.628270 | 3.426657 | # 0.051  |
| H | 3.820526  | 5.017148 | 6.893853 | # 0.014  |

|   |          |          |          |   |        |
|---|----------|----------|----------|---|--------|
| H | 9.005383 | 4.474279 | 2.570298 | # | 0.034  |
| H | 5.408025 | 6.962966 | 6.894147 | # | 0.016  |
| H | 7.896473 | 6.725710 | 2.565345 | # | 0.053  |
| H | 4.601689 | 7.983738 | 4.740203 | # | 0.020  |
| H | 8.891071 | 7.588336 | 4.740203 | # | 0.037  |
| H | 6.829706 | 8.673996 | 5.621768 | # | 0.027  |
| H | 6.829706 | 8.673996 | 3.858638 | # | 0.026  |
| H | 4.893997 | 3.250957 | 4.740203 | # | -0.033 |

44

Triamantane C<sub>16</sub>H<sub>26</sub> +2

|   |          |          |          |   |        |
|---|----------|----------|----------|---|--------|
| C | 8.690180 | 4.818025 | 6.168753 | # | -0.011 |
| C | 3.446400 | 5.843572 | 3.446400 | # | -0.012 |
| C | 7.424393 | 5.515772 | 6.616445 | # | 0.009  |
| C | 4.748201 | 6.471868 | 3.915717 | # | 0.029  |
| C | 6.097910 | 4.904857 | 6.180841 | # | 0.007  |
| C | 6.021074 | 5.598000 | 3.713291 | # | 0.009  |
| C | 6.097901 | 4.383665 | 4.703557 | # | 0.056  |
| C | 7.387440 | 3.577741 | 4.407486 | # | -0.003 |
| C | 4.865203 | 3.446400 | 4.550697 | # | -0.014 |
| C | 8.633971 | 4.451404 | 4.663564 | # | 0.054  |
| C | 3.578976 | 3.999982 | 5.082965 | # | 0.017  |
| C | 8.605684 | 5.698105 | 3.745637 | # | -0.002 |
| C | 3.591645 | 4.861012 | 6.310969 | # | -0.010 |
| C | 7.283877 | 6.512065 | 3.853815 | # | 0.028  |
| C | 4.832352 | 5.791438 | 6.406723 | # | 0.033  |
| C | 7.227708 | 7.391710 | 5.096929 | # | 0.003  |
| C | 4.736577 | 6.974526 | 5.390166 | # | 0.038  |
| C | 5.905889 | 7.978374 | 5.542346 | # | -0.002 |
| H | 8.779417 | 3.901477 | 6.776896 | # | 0.082  |
| H | 3.475197 | 5.435752 | 2.430623 | # | 0.115  |
| H | 9.572525 | 5.421148 | 6.411808 | # | 0.077  |
| H | 2.559829 | 6.464946 | 3.611377 | # | 0.116  |
| H | 7.426394 | 5.900547 | 7.645008 | # | 0.114  |
| H | 4.849974 | 7.356429 | 3.263270 | # | 0.052  |
| H | 6.012090 | 4.025229 | 6.846541 | # | 0.044  |
| H | 6.029603 | 5.194742 | 2.691185 | # | 0.038  |
| H | 7.421316 | 2.679137 | 5.039587 | # | 0.029  |
| H | 4.749281 | 3.084365 | 3.521709 | # | 0.082  |
| H | 7.374266 | 3.229013 | 3.366575 | # | 0.036  |
| H | 5.037595 | 2.528364 | 5.148520 | # | 0.095  |
| H | 9.535217 | 3.876271 | 4.425256 | # | 0.061  |
| H | 2.678922 | 3.395851 | 4.917525 | # | 0.160  |
| H | 9.466784 | 6.347244 | 3.949998 | # | 0.040  |
| H | 2.649067 | 5.408857 | 6.424377 | # | 0.092  |
| H | 8.713684 | 5.367239 | 2.706144 | # | 0.051  |

|   |          |          |          |   |        |
|---|----------|----------|----------|---|--------|
| H | 3.599480 | 4.142987 | 7.154373 | # | 0.106  |
| H | 7.266533 | 7.233766 | 3.017393 | # | 0.067  |
| H | 4.846334 | 6.211355 | 7.420959 | # | 0.047  |
| H | 8.098536 | 8.047865 | 5.223328 | # | 0.127  |
| H | 3.805826 | 7.519557 | 5.594229 | # | 0.039  |
| H | 5.720608 | 8.856599 | 4.901106 | # | 0.088  |
| H | 5.977504 | 8.375650 | 6.561885 | # | 0.074  |
| H | 7.533213 | 6.637372 | 6.073609 | # | -0.034 |
| H | 3.151505 | 4.885089 | 4.063282 | # | -0.029 |

45

Triamantane C<sub>16</sub>H<sub>26</sub> +3

|   |          |          |          |   |        |
|---|----------|----------|----------|---|--------|
| C | 8.763284 | 4.993583 | 6.225890 | # | -0.008 |
| C | 3.468827 | 6.118845 | 3.446400 | # | -0.005 |
| C | 7.447388 | 5.672966 | 6.615902 | # | 0.009  |
| C | 4.808490 | 6.674086 | 3.908675 | # | 0.023  |
| C | 6.103912 | 5.051245 | 6.184180 | # | 0.015  |
| C | 6.053208 | 5.741510 | 3.718091 | # | 0.019  |
| C | 6.016716 | 4.518431 | 4.709130 | # | 0.062  |
| C | 7.060820 | 3.446400 | 4.358035 | # | -0.044 |
| C | 4.670023 | 3.704157 | 4.573329 | # | -0.033 |
| C | 9.032323 | 4.865414 | 4.753374 | # | 0.029  |
| C | 3.446400 | 4.361198 | 5.141163 | # | 0.022  |
| C | 8.705803 | 5.929945 | 3.747087 | # | -0.006 |
| C | 3.574908 | 5.192265 | 6.378514 | # | -0.007 |
| C | 7.334612 | 6.656180 | 3.878225 | # | 0.011  |
| C | 4.884290 | 6.023010 | 6.417124 | # | 0.036  |
| C | 7.276126 | 7.598287 | 5.061829 | # | 0.006  |
| C | 4.810470 | 7.194793 | 5.379856 | # | 0.023  |
| C | 5.986999 | 8.187181 | 5.519702 | # | -0.011 |
| H | 8.847346 | 4.017840 | 6.726269 | # | 0.137  |
| H | 3.473558 | 5.613302 | 2.475516 | # | 0.128  |
| H | 9.621657 | 5.564232 | 6.631921 | # | 0.150  |
| H | 2.645265 | 6.838370 | 3.522224 | # | 0.152  |
| H | 7.435636 | 5.922530 | 7.685948 | # | 0.139  |
| H | 4.952054 | 7.542376 | 3.243411 | # | 0.064  |
| H | 5.974370 | 4.193800 | 6.866331 | # | 0.058  |
| H | 6.064470 | 5.358423 | 2.688851 | # | 0.056  |
| H | 7.126749 | 2.624005 | 5.078914 | # | 0.129  |
| H | 4.499733 | 3.381674 | 3.539295 | # | 0.100  |
| H | 6.985519 | 3.069441 | 3.330551 | # | 0.142  |
| H | 4.757910 | 2.761498 | 5.147147 | # | 0.113  |
| H | 9.906796 | 4.249848 | 4.501774 | # | 0.187  |
| H | 2.506073 | 3.811429 | 5.004572 | # | 0.192  |
| H | 9.535826 | 6.660955 | 3.829908 | # | 0.134  |
| H | 2.685990 | 5.811974 | 6.545542 | # | 0.113  |

|   |          |          |          |   |        |
|---|----------|----------|----------|---|--------|
| H | 8.818486 | 5.527146 | 2.733253 | # | 0.122  |
| H | 3.556334 | 4.463322 | 7.213381 | # | 0.123  |
| H | 7.306120 | 7.357474 | 3.019551 | # | 0.118  |
| H | 4.960306 | 6.458278 | 7.421369 | # | 0.063  |
| H | 8.183082 | 8.186956 | 5.253837 | # | 0.165  |
| H | 3.889598 | 7.755800 | 5.579067 | # | 0.076  |
| H | 5.818770 | 9.070510 | 4.867988 | # | 0.137  |
| H | 6.076813 | 8.616552 | 6.525527 | # | 0.114  |
| H | 7.539166 | 6.764678 | 6.187833 | # | -0.025 |
| H | 3.044183 | 5.272398 | 4.156777 | # | -0.019 |
| H | 8.170294 | 3.821019 | 4.343741 | # | -0.016 |

50

Tetramantane "globular" C<sub>22</sub>H<sub>28</sub>

|   |          |          |          |   |        |
|---|----------|----------|----------|---|--------|
| C | 6.444273 | 4.674736 | 5.672897 | # | 0.020  |
| C | 5.598691 | 3.456643 | 6.137483 | # | -0.003 |
| C | 4.201076 | 3.464055 | 5.472204 | # | 0.044  |
| C | 3.446400 | 4.743757 | 5.890060 | # | 0.029  |
| C | 4.254686 | 5.973892 | 5.433078 | # | 0.026  |
| C | 5.666667 | 5.974274 | 6.081386 | # | 0.014  |
| C | 6.458058 | 7.236481 | 5.661892 | # | 0.019  |
| C | 6.592875 | 7.236699 | 4.115327 | # | 0.035  |
| C | 5.204607 | 7.230181 | 3.446400 | # | -0.004 |
| C | 4.427680 | 5.974899 | 3.888046 | # | 0.032  |
| C | 5.178015 | 4.675479 | 3.471465 | # | 0.040  |
| C | 4.355429 | 3.446512 | 3.931782 | # | -0.001 |
| C | 6.606886 | 4.674861 | 4.103967 | # | 0.022  |
| C | 7.452503 | 3.456959 | 3.639276 | # | 0.013  |
| C | 8.850280 | 3.464316 | 4.304548 | # | 0.049  |
| C | 8.695854 | 3.446400 | 5.844892 | # | 0.002  |
| C | 7.873062 | 4.675230 | 6.305450 | # | 0.033  |
| C | 8.623213 | 5.974770 | 5.889089 | # | 0.036  |
| C | 7.846313 | 7.229988 | 6.330894 | # | 0.022  |
| C | 7.384351 | 5.974637 | 3.695639 | # | 0.024  |
| C | 8.796234 | 5.974139 | 4.343906 | # | 0.030  |
| C | 9.604704 | 4.744196 | 3.886772 | # | 0.001  |
| H | 6.106090 | 2.512748 | 5.911174 | # | -0.004 |
| H | 5.490391 | 3.499080 | 7.232011 | # | -0.022 |
| H | 3.638184 | 2.577279 | 5.795659 | # | -0.014 |
| H | 3.310163 | 4.765103 | 6.980810 | # | -0.027 |
| H | 2.443974 | 4.759965 | 5.438694 | # | -0.016 |
| H | 3.728937 | 6.893390 | 5.733177 | # | -0.017 |
| H | 5.555179 | 5.971993 | 7.178226 | # | -0.023 |
| H | 5.898298 | 8.130555 | 5.976437 | # | -0.018 |
| H | 4.644263 | 8.134901 | 3.723373 | # | -0.013 |
| H | 5.315669 | 7.241848 | 2.352448 | # | -0.010 |
| H | 3.433579 | 5.973064 | 3.415579 | # | -0.017 |
| H | 5.281950 | 4.657708 | 2.374818 | # | -0.031 |

|   |           |          |          |   |        |
|---|-----------|----------|----------|---|--------|
| H | 3.363473  | 3.475206 | 3.458230 | # | -0.009 |
| H | 4.829750  | 2.512554 | 3.606102 | # | -0.011 |
| H | 7.560931  | 3.499664 | 2.544767 | # | -0.028 |
| H | 6.945369  | 2.512856 | 3.865348 | # | -0.015 |
| H | 8.221741  | 2.512335 | 6.170493 | # | -0.010 |
| H | 7.769077  | 4.657163 | 7.402092 | # | -0.023 |
| H | 7.735169  | 7.241425 | 7.424839 | # | -0.027 |
| H | 7.495775  | 5.972618 | 2.598793 | # | -0.031 |
| H | 9.321838  | 6.893781 | 4.044015 | # | -0.019 |
| H | 9.741049  | 4.765802 | 2.796007 | # | -0.007 |
| H | 7.152528  | 8.130892 | 3.800986 | # | -0.016 |
| H | 9.413118  | 2.577651 | 3.980765 | # | -0.013 |
| H | 9.687776  | 3.475210 | 6.318498 | # | -0.007 |
| H | 9.617327  | 5.972913 | 6.361527 | # | -0.019 |
| H | 8.406571  | 8.134814 | 6.054066 | # | -0.012 |
| H | 10.607156 | 4.760537 | 4.338165 | # | -0.013 |

49

Tetramantane "globular" C<sub>22</sub>H<sub>27</sub> +

|   |           |          |          |   |        |
|---|-----------|----------|----------|---|--------|
| C | 6.696809  | 4.716953 | 4.023267 | # | -0.043 |
| C | 7.541802  | 3.482501 | 3.626323 | # | -0.008 |
| C | 8.912934  | 3.498931 | 4.344026 | # | 0.060  |
| C | 9.675313  | 4.786329 | 3.966494 | # | -0.006 |
| C | 8.858161  | 6.009849 | 4.426525 | # | 0.044  |
| C | 7.473326  | 6.041101 | 3.725201 | # | 0.029  |
| C | 6.650738  | 7.275604 | 4.158872 | # | 0.040  |
| C | 6.474789  | 7.253525 | 5.701012 | # | 0.029  |
| C | 7.844709  | 7.233137 | 6.406641 | # | 0.018  |
| C | 8.634746  | 5.987245 | 5.962523 | # | 0.025  |
| C | 7.885274  | 4.677602 | 6.339941 | # | 0.025  |
| C | 8.707589  | 3.452173 | 5.875209 | # | -0.004 |
| C | 6.438594  | 4.690200 | 5.756160 | # | -0.011 |
| C | 5.602074  | 3.446400 | 6.123498 | # | -0.015 |
| C | 4.225614  | 3.465956 | 5.434586 | # | 0.040  |
| C | 4.474636  | 3.490338 | 3.841413 | # | -0.021 |
| C | 5.279388  | 4.721790 | 3.704314 | # | 0.030  |
| C | 4.523666  | 5.988602 | 3.838330 | # | -0.007 |
| C | 5.287803  | 7.263262 | 3.446400 | # | 0.011  |
| C | 5.665007  | 5.992750 | 6.103977 | # | 0.002  |
| C | 4.269203  | 5.976793 | 5.443503 | # | 0.022  |
| C | 3.446400  | 4.734898 | 5.822106 | # | 0.000  |
| H | 7.025130  | 2.543675 | 3.841901 | # | 0.010  |
| H | 7.697059  | 3.517077 | 2.538803 | # | 0.034  |
| H | 9.483239  | 2.618320 | 4.023849 | # | 0.025  |
| H | 9.843561  | 4.827445 | 2.881547 | # | 0.011  |
| H | 10.663939 | 4.793541 | 4.443038 | # | 0.022  |



|   |          |          |          |          |
|---|----------|----------|----------|----------|
| H | 9.393309 | 6.931408 | 4.158622 | # 0.012  |
| H | 7.637373 | 6.078911 | 2.637302 | # 0.001  |
| H | 7.202383 | 8.181963 | 3.875973 | # 0.020  |
| H | 8.408912 | 8.141850 | 6.159427 | # 0.014  |
| H | 7.707681 | 7.231567 | 7.496893 | # -0.001 |
| H | 9.611166 | 5.975924 | 6.465202 | # 0.015  |
| H | 7.766260 | 4.638976 | 7.434768 | # 0.021  |
| H | 9.682170 | 3.474746 | 6.379219 | # 0.025  |
| H | 8.230945 | 2.511206 | 6.175176 | # 0.005  |
| H | 5.462913 | 3.442850 | 7.213516 | # 0.044  |
| H | 6.132174 | 2.522098 | 5.882663 | # 0.029  |
| H | 4.981980 | 2.575035 | 3.537333 | # 0.057  |
| H | 5.419852 | 7.305134 | 2.357827 | # 0.028  |
| H | 5.529761 | 6.005754 | 7.196579 | # 0.034  |
| H | 3.721726 | 6.900512 | 5.668011 | # 0.044  |
| H | 3.253420 | 4.733248 | 6.902660 | # 0.044  |
| H | 5.909799 | 8.143553 | 6.011865 | # 0.015  |
| H | 3.655331 | 2.557949 | 5.658040 | # 0.052  |
| H | 3.507751 | 3.560343 | 3.337132 | # 0.064  |
| H | 3.544645 | 5.923700 | 3.352900 | # 0.052  |
| H | 4.690197 | 8.139037 | 3.727530 | # 0.028  |
| H | 2.467128 | 4.757077 | 5.328512 | # 0.027  |

51

Tetramantane "globular" C22H29 +

|   |          |          |          |          |
|---|----------|----------|----------|----------|
| C | 6.572287 | 4.677332 | 4.263023 | # 0.031  |
| C | 7.430883 | 3.469217 | 3.786810 | # 0.010  |
| C | 8.844452 | 3.503251 | 4.417448 | # 0.053  |
| C | 9.577421 | 4.804101 | 4.015305 | # -0.001 |
| C | 8.751916 | 6.024320 | 4.491307 | # 0.028  |
| C | 7.359528 | 5.954291 | 3.788549 | # -0.008 |
| C | 6.570474 | 7.243203 | 3.843760 | # -0.007 |
| C | 6.453346 | 7.243203 | 6.256859 | # 0.000  |
| C | 7.908349 | 7.195614 | 6.654217 | # 0.010  |
| C | 8.622394 | 5.969877 | 6.044511 | # 0.043  |
| C | 7.887379 | 4.661022 | 6.448697 | # 0.034  |
| C | 8.710006 | 3.446401 | 5.956725 | # -0.001 |
| C | 6.451533 | 4.677332 | 5.837595 | # 0.031  |
| C | 5.592937 | 3.469217 | 6.313807 | # 0.008  |
| C | 4.179368 | 3.503250 | 5.683169 | # 0.051  |
| C | 4.313814 | 3.446401 | 4.143892 | # -0.009 |
| C | 5.136441 | 4.661022 | 3.651921 | # 0.034  |
| C | 4.401427 | 5.969877 | 4.056108 | # 0.040  |
| C | 5.115471 | 7.195614 | 3.446400 | # 0.005  |
| C | 5.664292 | 5.954291 | 6.312069 | # 0.006  |
| C | 4.271904 | 6.024321 | 5.609311 | # 0.020  |

|   |           |          |          |   |        |
|---|-----------|----------|----------|---|--------|
| C | 3.446400  | 4.804102 | 6.085312 | # | -0.009 |
| H | 6.945221  | 2.521739 | 4.036231 | # | 0.011  |
| H | 7.503280  | 3.502943 | 2.689469 | # | -0.008 |
| H | 9.418417  | 2.637444 | 4.064462 | # | 0.019  |
| H | 9.713145  | 4.848095 | 2.926055 | # | 0.010  |
| H | 10.578730 | 4.830215 | 4.463726 | # | 0.017  |
| H | 9.263938  | 6.954131 | 4.199328 | # | 0.002  |
| H | 7.546515  | 5.826570 | 2.703896 | # | 0.041  |
| H | 7.130125  | 8.132145 | 3.522894 | # | 0.097  |
| H | 8.416183  | 8.135808 | 6.404835 | # | 0.041  |
| H | 7.928822  | 7.122267 | 7.754979 | # | 0.052  |
| H | 9.639886  | 5.946265 | 6.456576 | # | 0.016  |
| H | 7.801681  | 4.621407 | 7.545930 | # | -0.015 |
| H | 9.702998  | 3.468832 | 6.425313 | # | 0.014  |
| H | 8.242060  | 2.505221 | 6.266747 | # | 0.015  |
| H | 5.520540  | 3.502944 | 7.411149 | # | -0.009 |
| H | 6.078600  | 2.521739 | 6.064387 | # | 0.012  |
| H | 4.781760  | 2.505221 | 3.833871 | # | 0.015  |
| H | 5.222139  | 4.621407 | 2.554687 | # | -0.013 |
| H | 5.094998  | 7.122267 | 2.345639 | # | 0.052  |
| H | 5.477305  | 5.826570 | 7.396723 | # | 0.040  |
| H | 3.759882  | 6.954131 | 5.901290 | # | 0.004  |
| H | 3.310675  | 4.848096 | 7.174562 | # | 0.008  |
| H | 5.893695  | 8.132145 | 6.577725 | # | 0.097  |
| H | 3.605403  | 2.637445 | 6.036156 | # | 0.020  |
| H | 3.320822  | 3.468832 | 3.675305 | # | 0.015  |
| H | 3.383934  | 5.946265 | 3.644043 | # | 0.021  |
| H | 4.607637  | 8.135809 | 3.695783 | # | 0.042  |
| H | 2.445091  | 4.830215 | 5.636892 | # | 0.021  |
| H | 6.511909  | 7.593868 | 5.050309 | # | -0.036 |

52

Tetramantane "globular" C<sub>22</sub>H<sub>30</sub> 2+

|   |          |          |          |   |        |
|---|----------|----------|----------|---|--------|
| C | 6.462988 | 4.676380 | 5.742301 | # | 0.038  |
| C | 5.639166 | 3.458986 | 6.277153 | # | -0.020 |
| C | 4.170107 | 3.508129 | 6.017076 | # | 0.028  |
| C | 3.446400 | 4.799485 | 6.041782 | # | -0.029 |
| C | 4.281993 | 5.981504 | 5.494804 | # | 0.032  |
| C | 5.688563 | 5.986107 | 6.143804 | # | 0.022  |
| C | 6.488412 | 7.247474 | 5.726439 | # | 0.041  |
| C | 6.604593 | 7.247475 | 4.181500 | # | 0.032  |
| C | 5.208157 | 7.249482 | 3.527812 | # | 0.013  |
| C | 4.437061 | 5.977198 | 3.948331 | # | 0.040  |
| C | 5.230958 | 4.730116 | 3.446400 | # | 0.031  |
| C | 4.402521 | 3.446400 | 3.475650 | # | -0.034 |

|   |           |          |          |   |        |
|---|-----------|----------|----------|---|--------|
| C | 6.630017  | 4.676380 | 4.165637 | # | 0.031  |
| C | 7.453838  | 3.458986 | 3.630784 | # | -0.014 |
| C | 8.922896  | 3.508129 | 3.890862 | # | 0.036  |
| C | 8.690488  | 3.446400 | 6.432289 | # | -0.030 |
| C | 7.862048  | 4.730115 | 6.461538 | # | 0.027  |
| C | 8.655943  | 5.977198 | 5.959606 | # | 0.022  |
| C | 7.884850  | 7.249481 | 6.380127 | # | 0.008  |
| C | 7.404442  | 5.986107 | 3.764134 | # | 0.004  |
| C | 8.811012  | 5.981503 | 4.413133 | # | 0.041  |
| C | 9.646605  | 4.799485 | 3.866154 | # | -0.026 |
| H | 6.038490  | 2.482004 | 5.986181 | # | 0.050  |
| H | 5.701209  | 3.466428 | 7.386222 | # | 0.097  |
| H | 3.597998  | 2.596255 | 6.221191 | # | 0.157  |
| H | 3.238934  | 4.967808 | 7.121302 | # | 0.113  |
| H | 2.453223  | 4.716490 | 5.584080 | # | 0.092  |
| H | 3.757402  | 6.902725 | 5.775466 | # | 0.048  |
| H | 5.580689  | 5.986826 | 7.240097 | # | -0.008 |
| H | 5.934424  | 8.137820 | 6.051124 | # | 0.029  |
| H | 4.653672  | 8.145932 | 3.830249 | # | 0.043  |
| H | 5.294424  | 7.287856 | 2.434090 | # | 0.019  |
| H | 3.444838  | 5.980923 | 3.477371 | # | 0.026  |
| H | 5.442035  | 4.895152 | 2.375363 | # | 0.032  |
| H | 3.427651  | 3.565306 | 2.991766 | # | 0.108  |
| H | 4.903830  | 2.548433 | 3.101669 | # | 0.079  |
| H | 7.391796  | 3.466430 | 2.521715 | # | 0.089  |
| H | 7.054514  | 2.482005 | 3.921756 | # | 0.050  |
| H | 8.189178  | 2.548433 | 6.806270 | # | 0.084  |
| H | 7.650971  | 4.895151 | 7.532575 | # | 0.035  |
| H | 7.798582  | 7.287854 | 7.473849 | # | 0.030  |
| H | 7.512315  | 5.986827 | 2.667841 | # | 0.013  |
| H | 9.335604  | 6.902724 | 4.132472 | # | 0.047  |
| H | 9.854068  | 4.967808 | 2.786633 | # | 0.112  |
| H | 7.158581  | 8.137822 | 3.856814 | # | 0.031  |
| H | 9.495007  | 2.596256 | 3.686745 | # | 0.147  |
| H | 9.665357  | 3.565307 | 6.916171 | # | 0.098  |
| H | 9.648168  | 5.980922 | 6.430566 | # | 0.031  |
| H | 8.439335  | 8.145931 | 6.077691 | # | 0.037  |
| H | 10.639782 | 4.716490 | 4.323855 | # | 0.095  |
| H | 8.989683  | 3.133190 | 5.362910 | # | -0.033 |
| H | 4.103322  | 3.133189 | 4.545028 | # | -0.034 |

53

Tetramantane "globular" C<sub>22</sub>H<sub>31</sub> 3+

|   |          |          |          |   |        |
|---|----------|----------|----------|---|--------|
| C | 5.186859 | 7.134748 | 4.704544 | # | 0.040  |
| C | 5.203214 | 8.131591 | 3.497416 | # | -0.037 |
| C | 6.213982 | 9.239129 | 3.576765 | # | 0.024  |

|   |          |           |          |   |        |
|---|----------|-----------|----------|---|--------|
| C | 6.570894 | 9.844873  | 4.890306 | # | -0.014 |
| C | 6.570894 | 8.823153  | 6.056253 | # | 0.037  |
| C | 5.223470 | 8.037096  | 5.998892 | # | 0.007  |
| C | 4.833436 | 7.331130  | 7.291471 | # | -0.001 |
| C | 6.792816 | 5.960143  | 7.291471 | # | 0.003  |
| C | 7.913624 | 6.971729  | 7.242298 | # | -0.005 |
| C | 7.811310 | 7.877582  | 5.992741 | # | 0.031  |
| C | 7.789562 | 6.963657  | 4.726622 | # | 0.031  |
| C | 8.179852 | 7.701303  | 3.446400 | # | -0.028 |
| C | 6.439394 | 6.156525  | 4.704544 | # | 0.043  |
| C | 6.423038 | 5.159682  | 3.497416 | # | -0.023 |
| C | 5.412271 | 4.052144  | 3.576765 | # | 0.022  |
| C | 3.446400 | 5.589970  | 3.446400 | # | -0.026 |
| C | 3.836691 | 6.327616  | 4.726622 | # | 0.029  |
| C | 3.814943 | 5.413692  | 5.992741 | # | 0.027  |
| C | 3.712629 | 6.319544  | 7.242298 | # | 0.007  |
| C | 6.402782 | 5.254178  | 5.998892 | # | -0.012 |
| C | 5.055358 | 4.468121  | 6.056253 | # | 0.046  |
| C | 5.055358 | 3.446400  | 4.890306 | # | -0.030 |
| H | 5.267207 | 7.639083  | 2.522408 | # | 0.070  |
| H | 4.231591 | 8.666308  | 3.467431 | # | 0.116  |
| H | 6.302979 | 9.879619  | 2.690470 | # | 0.185  |
| H | 5.791856 | 10.618040 | 5.060256 | # | 0.127  |
| H | 7.501641 | 10.422020 | 4.830753 | # | 0.117  |
| H | 6.624904 | 9.396245  | 6.990258 | # | 0.065  |
| H | 4.412127 | 8.781470  | 5.889468 | # | 0.054  |
| H | 4.838590 | 7.986670  | 8.173248 | # | 0.154  |
| H | 7.960510 | 7.552547  | 8.171011 | # | 0.096  |
| H | 8.858402 | 6.401864  | 7.216199 | # | 0.110  |
| H | 8.711826 | 8.503295  | 5.969111 | # | 0.064  |
| H | 8.596970 | 6.220479  | 4.849241 | # | 0.046  |
| H | 9.128565 | 8.241186  | 3.539607 | # | 0.140  |
| H | 8.167933 | 7.108806  | 2.526789 | # | 0.112  |
| H | 7.394662 | 4.624966  | 3.467431 | # | 0.111  |
| H | 6.359046 | 5.652190  | 2.522408 | # | 0.068  |
| H | 3.458319 | 6.182467  | 2.526789 | # | 0.105  |
| H | 3.029283 | 7.070795  | 4.849241 | # | 0.050  |
| H | 2.767851 | 6.889409  | 7.216199 | # | 0.104  |
| H | 7.214125 | 4.509803  | 5.889468 | # | 0.062  |
| H | 5.001348 | 3.895028  | 6.990258 | # | 0.063  |
| H | 5.834397 | 2.673233  | 5.060256 | # | 0.136  |
| H | 6.787663 | 5.304604  | 8.173248 | # | 0.147  |
| H | 5.323273 | 3.411654  | 2.690470 | # | 0.179  |
| H | 2.497688 | 5.050087  | 3.539607 | # | 0.137  |
| H | 2.914426 | 4.787979  | 5.969111 | # | 0.065  |
| H | 3.665743 | 5.738726  | 8.171011 | # | 0.093  |
| H | 4.124612 | 2.869252  | 4.830753 | # | 0.124  |
| H | 4.171799 | 4.718120  | 3.178203 | # | -0.021 |

|   |          |          |          |   |        |
|---|----------|----------|----------|---|--------|
| H | 7.454453 | 8.573153 | 3.178203 | # | -0.024 |
| H | 5.813126 | 6.645637 | 7.681468 | # | -0.025 |

50

Tetramantane "planar" C<sub>22</sub>H<sub>28</sub>

|   |          |           |          |   |        |
|---|----------|-----------|----------|---|--------|
| C | 5.658696 | 6.052935  | 5.964785 | # | 0.040  |
| C | 4.176053 | 8.141594  | 5.967910 | # | 0.002  |
| C | 5.631146 | 7.601279  | 5.964785 | # | -0.008 |
| C | 6.387721 | 8.139654  | 4.707803 | # | 0.016  |
| C | 5.631146 | 7.601279  | 3.450822 | # | -0.010 |
| C | 4.176053 | 8.141594  | 3.447696 | # | -0.001 |
| C | 3.446400 | 7.597157  | 4.707803 | # | 0.001  |
| C | 3.455420 | 6.054625  | 4.707803 | # | 0.013  |
| C | 4.902121 | 5.514559  | 4.707803 | # | 0.038  |
| C | 4.928473 | 3.968378  | 4.707803 | # | -0.004 |
| C | 6.384299 | 3.446400  | 4.707803 | # | 0.048  |
| C | 7.113789 | 3.967310  | 5.969207 | # | 0.006  |
| C | 7.113789 | 5.512620  | 5.967910 | # | 0.025  |
| C | 7.843442 | 6.057056  | 4.707803 | # | 0.050  |
| C | 7.834422 | 7.599589  | 4.707803 | # | -0.025 |
| C | 5.658696 | 6.052935  | 3.450822 | # | 0.035  |
| C | 7.113789 | 5.512620  | 3.447696 | # | 0.020  |
| C | 7.113789 | 3.967310  | 3.446400 | # | -0.006 |
| C | 4.176053 | 9.686904  | 5.969207 | # | 0.041  |
| C | 6.361369 | 9.685836  | 4.707803 | # | 0.029  |
| C | 4.176053 | 9.686904  | 3.446400 | # | 0.036  |
| C | 4.905542 | 10.207813 | 4.707803 | # | 0.068  |
| H | 6.150395 | 7.966186  | 6.867189 | # | -0.022 |
| H | 3.660963 | 7.772626  | 2.546813 | # | -0.016 |
| H | 2.406563 | 7.959397  | 4.707803 | # | -0.014 |
| H | 4.392448 | 3.592665  | 3.822702 | # | -0.013 |
| H | 4.392448 | 3.592665  | 5.592905 | # | -0.008 |
| H | 6.614796 | 3.593168  | 6.875361 | # | -0.016 |
| H | 7.628879 | 5.881587  | 6.868793 | # | -0.015 |
| H | 8.367658 | 7.979666  | 5.592954 | # | -0.010 |
| H | 5.139447 | 5.688027  | 2.548418 | # | -0.018 |
| H | 7.628879 | 5.881587  | 2.546813 | # | -0.015 |
| H | 6.614796 | 3.593168  | 2.540246 | # | -0.010 |
| H | 6.150395 | 7.966186  | 2.548418 | # | -0.020 |
| H | 6.382519 | 2.347146  | 4.707803 | # | -0.016 |
| H | 8.147345 | 3.591408  | 5.990829 | # | -0.004 |
| H | 8.883279 | 5.694817  | 4.707803 | # | -0.016 |
| H | 8.367658 | 7.979666  | 3.822654 | # | -0.013 |
| H | 8.147345 | 3.591408  | 3.424777 | # | -0.004 |
| H | 4.675046 | 10.061046 | 6.875361 | # | -0.014 |
| H | 3.142497 | 10.062805 | 5.990829 | # | -0.014 |

|   |          |           |          |   |        |
|---|----------|-----------|----------|---|--------|
| H | 6.897394 | 10.061549 | 3.822702 | # | -0.013 |
| H | 6.897394 | 10.061549 | 5.592905 | # | -0.014 |
| H | 4.907323 | 11.307068 | 4.707803 | # | -0.030 |
| H | 3.142497 | 10.062805 | 3.424777 | # | -0.014 |
| H | 4.675046 | 10.061046 | 2.540246 | # | -0.012 |
| H | 5.139447 | 5.688027  | 6.867189 | # | -0.026 |
| H | 2.922184 | 5.674548  | 3.822654 | # | -0.003 |
| H | 2.922184 | 5.674548  | 5.592954 | # | -0.009 |
| H | 3.660963 | 7.772626  | 6.868793 | # | -0.016 |

49

Tetramantane "planar" C<sub>22</sub>H<sub>27</sub> +

|   |          |           |          |   |        |
|---|----------|-----------|----------|---|--------|
| C | 6.065332 | 7.434138  | 5.965288 | # | 0.012  |
| C | 6.633745 | 4.947990  | 5.963060 | # | 0.012  |
| C | 5.492660 | 5.981826  | 5.968733 | # | 0.003  |
| C | 4.607325 | 5.806347  | 4.707591 | # | 0.025  |
| C | 5.492660 | 5.981826  | 3.446449 | # | 0.004  |
| C | 6.633745 | 4.947990  | 3.452121 | # | 0.020  |
| C | 7.512869 | 5.146410  | 4.707591 | # | 0.030  |
| C | 8.098701 | 6.586933  | 4.707591 | # | 0.009  |
| C | 6.966371 | 7.635397  | 4.707591 | # | 0.034  |
| C | 7.532104 | 9.078076  | 4.707591 | # | 0.000  |
| C | 6.379404 | 10.109509 | 4.707591 | # | 0.045  |
| C | 5.507466 | 9.907261  | 5.968782 | # | 0.009  |
| C | 4.916156 | 8.477762  | 5.968561 | # | 0.029  |
| C | 4.039804 | 8.248375  | 4.707591 | # | 0.029  |
| C | 3.446400 | 6.814244  | 4.707591 | # | 0.003  |
| C | 6.065332 | 7.434138  | 3.449894 | # | 0.015  |
| C | 4.916156 | 8.477762  | 3.446621 | # | 0.035  |
| C | 5.507466 | 9.907261  | 3.446400 | # | 0.006  |
| C | 5.993152 | 3.446400  | 5.956140 | # | -0.037 |
| C | 3.992796 | 4.269591  | 4.707591 | # | -0.036 |
| C | 5.993152 | 3.446400  | 3.459042 | # | -0.023 |
| C | 5.231496 | 3.506633  | 4.707591 | # | 0.059  |
| H | 4.874595 | 5.851352  | 6.868929 | # | 0.018  |
| H | 7.231357 | 5.008488  | 2.535206 | # | 0.048  |
| H | 8.337007 | 4.421040  | 4.707591 | # | 0.017  |
| H | 8.169960 | 9.221513  | 3.823891 | # | 0.006  |
| H | 8.169960 | 9.221513  | 5.591291 | # | 0.005  |
| H | 6.107177 | 10.062820 | 6.876061 | # | 0.010  |
| H | 4.302069 | 8.334657  | 6.870033 | # | 0.007  |
| H | 2.815190 | 6.665805  | 5.593737 | # | 0.017  |
| H | 6.678207 | 7.570171  | 2.546449 | # | 0.004  |
| H | 4.302069 | 8.334657  | 2.545149 | # | 0.000  |
| H | 6.107177 | 10.062820 | 2.539120 | # | 0.008  |
| H | 4.874595 | 5.851352  | 2.546253 | # | 0.014  |

|   |          |           |          |   |       |
|---|----------|-----------|----------|---|-------|
| H | 6.799055 | 11.123299 | 4.707591 | # | 0.019 |
| H | 4.695529 | 10.646004 | 5.992154 | # | 0.008 |
| H | 3.205923 | 8.963464  | 4.707591 | # | 0.021 |
| H | 2.815190 | 6.665805  | 3.821445 | # | 0.017 |
| H | 4.695529 | 10.646004 | 3.423028 | # | 0.008 |
| H | 5.380451 | 3.329028  | 6.852135 | # | 0.077 |
| H | 6.810703 | 2.722916  | 5.948699 | # | 0.063 |
| H | 3.386977 | 4.159038  | 3.806435 | # | 0.072 |
| H | 3.386977 | 4.159038  | 5.608747 | # | 0.067 |
| H | 6.810703 | 2.722916  | 3.466483 | # | 0.063 |
| H | 5.380451 | 3.329028  | 2.563047 | # | 0.071 |
| H | 6.678207 | 7.570171  | 6.868733 | # | 0.011 |
| H | 8.738685 | 6.723859  | 3.825634 | # | 0.018 |
| H | 8.738685 | 6.723859  | 5.589548 | # | 0.021 |
| H | 7.231357 | 5.008488  | 6.879976 | # | 0.054 |

51

Tetramantane "planar" C<sub>22</sub>H<sub>29</sub> +

|   |           |          |          |   |        |
|---|-----------|----------|----------|---|--------|
| C | 7.631364  | 5.472700 | 5.973806 | # | 0.021  |
| C | 5.055987  | 4.920812 | 5.992164 | # | -0.003 |
| C | 6.211094  | 6.100273 | 5.980040 | # | -0.007 |
| C | 5.800832  | 6.757446 | 4.734459 | # | 0.034  |
| C | 6.211094  | 6.100273 | 3.488878 | # | -0.007 |
| C | 5.055987  | 4.920812 | 3.476754 | # | -0.005 |
| C | 5.280229  | 4.051176 | 4.734459 | # | 0.028  |
| C | 6.690889  | 3.446400 | 4.734459 | # | 0.019  |
| C | 7.781534  | 4.538565 | 4.734459 | # | 0.039  |
| C | 9.166912  | 3.849774 | 4.734459 | # | -0.003 |
| C | 10.288424 | 4.901677 | 4.734459 | # | 0.053  |
| C | 10.144406 | 5.753673 | 6.022518 | # | 0.004  |
| C | 8.791989  | 6.521287 | 5.996191 | # | 0.026  |
| C | 8.842097  | 7.438568 | 4.734459 | # | 0.039  |
| C | 7.937013  | 8.684596 | 4.734459 | # | -0.019 |
| C | 7.631364  | 5.472700 | 3.495111 | # | 0.021  |
| C | 8.791989  | 6.521289 | 3.472727 | # | 0.028  |
| C | 10.144406 | 5.753673 | 3.446400 | # | 0.004  |
| C | 3.654214  | 5.557462 | 6.007854 | # | -0.002 |
| C | 4.561473  | 7.560317 | 4.734459 | # | -0.016 |
| C | 3.654214  | 5.557462 | 3.461065 | # | -0.005 |
| C | 3.446400  | 6.401943 | 4.734459 | # | 0.032  |
| H | 6.033879  | 6.723498 | 6.862913 | # | 0.053  |
| H | 5.248329  | 4.350106 | 2.560399 | # | 0.054  |
| H | 4.536089  | 3.241670 | 4.734459 | # | 0.034  |
| H | 9.246093  | 3.200290 | 3.851152 | # | 0.002  |
| H | 9.246093  | 3.200290 | 5.617766 | # | 0.004  |
| H | 10.201757 | 5.098239 | 6.902379 | # | 0.002  |

|   |           |          |          |   |        |
|---|-----------|----------|----------|---|--------|
| H | 8.701826  | 7.138753 | 6.901911 | # | 0.002  |
| H | 8.137477  | 9.296957 | 5.622144 | # | 0.033  |
| H | 7.715602  | 4.868200 | 2.579737 | # | 0.011  |
| H | 8.701826  | 7.138753 | 2.567007 | # | 0.001  |
| H | 10.201758 | 5.098239 | 2.566539 | # | 0.004  |
| H | 6.033879  | 6.723498 | 2.606005 | # | 0.050  |
| H | 11.265937 | 4.403122 | 4.734459 | # | 0.024  |
| H | 10.967298 | 6.474298 | 6.107971 | # | 0.014  |
| H | 9.855325  | 7.866439 | 4.734459 | # | 0.007  |
| H | 8.137478  | 9.296958 | 3.846775 | # | 0.032  |
| H | 10.967298 | 6.474299 | 3.360948 | # | 0.013  |
| H | 3.517752  | 6.174378 | 6.904805 | # | 0.026  |
| H | 2.897281  | 4.763960 | 6.055734 | # | 0.048  |
| H | 4.442020  | 8.172868 | 3.837789 | # | 0.066  |
| H | 4.442020  | 8.172868 | 5.631130 | # | 0.066  |
| H | 2.469321  | 6.896260 | 4.734459 | # | 0.057  |
| H | 2.897281  | 4.763960 | 3.413184 | # | 0.048  |
| H | 3.517752  | 6.174379 | 2.564112 | # | 0.032  |
| H | 7.715602  | 4.868199 | 6.889180 | # | 0.015  |
| H | 6.820029  | 2.803554 | 3.852769 | # | 0.014  |
| H | 6.820029  | 2.803553 | 5.616148 | # | 0.014  |
| H | 5.248329  | 4.350105 | 6.908518 | # | 0.052  |
| H | 6.857183  | 8.493115 | 4.734457 | # | -0.043 |

52

Tetramantane "planar" C<sub>22</sub>H<sub>30</sub> 2+

|   |           |          |          |   |        |
|---|-----------|----------|----------|---|--------|
| C | 6.163723  | 5.719150 | 6.249031 | # | 0.018  |
| C | 8.669066  | 6.292247 | 6.361981 | # | 0.032  |
| C | 7.616947  | 5.178901 | 6.126564 | # | 0.012  |
| C | 7.833578  | 4.557420 | 4.708802 | # | 0.055  |
| C | 7.634735  | 5.697738 | 3.655059 | # | 0.004  |
| C | 8.614767  | 6.891618 | 3.860283 | # | 0.034  |
| C | 8.451890  | 7.421637 | 5.316401 | # | 0.043  |
| C | 7.012887  | 7.970488 | 5.465245 | # | -0.008 |
| C | 5.964881  | 6.859468 | 5.195289 | # | 0.048  |
| C | 4.543391  | 7.483838 | 5.266480 | # | -0.020 |
| C | 3.446400  | 6.602794 | 4.757296 | # | 0.020  |
| C | 3.749573  | 4.809017 | 6.457689 | # | -0.013 |
| C | 5.183693  | 4.525270 | 6.043806 | # | 0.032  |
| C | 5.346570  | 3.995251 | 4.587689 | # | 0.035  |
| C | 6.785573  | 3.446400 | 4.438845 | # | -0.008 |
| C | 6.181512  | 6.237987 | 3.777526 | # | 0.021  |
| C | 5.129393  | 5.124641 | 3.542109 | # | 0.041  |
| C | 3.702781  | 5.729752 | 3.570997 | # | -0.025 |
| C | 10.095678 | 5.687135 | 6.333094 | # | -0.010 |
| C | 9.255069  | 3.933052 | 4.637609 | # | -0.033 |



|   |           |          |          |   |        |
|---|-----------|----------|----------|---|--------|
| C | 10.048886 | 6.607870 | 3.446400 | # | -0.022 |
| C | 10.352059 | 4.814094 | 5.146794 | # | 0.022  |
| H | 7.749996  | 4.391647 | 6.884971 | # | 0.009  |
| H | 8.298781  | 7.697788 | 3.175666 | # | 0.048  |
| H | 9.165545  | 8.236142 | 5.498910 | # | 0.025  |
| H | 4.506680  | 8.370698 | 4.601276 | # | 0.094  |
| H | 4.311670  | 7.873679 | 6.265539 | # | 0.078  |
| H | 3.637254  | 5.214190 | 7.468864 | # | 0.099  |
| H | 5.499678  | 3.719100 | 6.728424 | # | 0.041  |
| H | 6.934539  | 2.616486 | 5.143724 | # | 0.024  |
| H | 6.048462  | 7.025241 | 3.019119 | # | 0.004  |
| H | 5.274642  | 4.692793 | 2.543607 | # | 0.033  |
| H | 3.571274  | 6.404220 | 2.701379 | # | 0.097  |
| H | 7.770314  | 5.279426 | 2.646242 | # | 0.017  |
| H | 2.418669  | 6.953062 | 4.907136 | # | 0.141  |
| H | 3.050791  | 3.988150 | 6.266544 | # | 0.113  |
| H | 4.632915  | 3.180746 | 4.405179 | # | 0.024  |
| H | 6.929216  | 3.034282 | 3.430844 | # | 0.029  |
| H | 2.921311  | 4.969467 | 3.456308 | # | 0.082  |
| H | 10.227183 | 5.012667 | 7.202712 | # | 0.095  |
| H | 10.877149 | 6.447420 | 6.447785 | # | 0.085  |
| H | 9.486790  | 3.543211 | 3.638550 | # | 0.078  |
| H | 9.291780  | 3.046190 | 5.302813 | # | 0.098  |
| H | 11.379790 | 4.463827 | 4.996954 | # | 0.143  |
| H | 10.747667 | 7.428740 | 3.637540 | # | 0.104  |
| H | 10.161203 | 6.202692 | 2.435228 | # | 0.107  |
| H | 6.028144  | 6.137463 | 7.257848 | # | 0.015  |
| H | 6.863920  | 8.800402 | 4.760366 | # | 0.023  |
| H | 6.869243  | 8.382606 | 6.473246 | # | 0.030  |
| H | 8.523816  | 6.724096 | 7.360483 | # | 0.039  |
| H | 10.533391 | 5.748935 | 4.085652 | # | -0.034 |
| H | 3.265071  | 5.667959 | 5.818443 | # | -0.034 |

53

Tetramantane "planar" C<sub>22</sub>H<sub>31</sub> 3+

|   |           |          |          |   |        |
|---|-----------|----------|----------|---|--------|
| C | 9.177765  | 7.256814 | 6.201585 | # | -0.008 |
| C | 6.916556  | 8.627794 | 6.276483 | # | 0.036  |
| C | 7.890963  | 7.876126 | 5.390068 | # | -0.023 |
| C | 7.481420  | 6.675930 | 4.610034 | # | 0.035  |
| C | 6.902771  | 5.494445 | 5.291328 | # | -0.022 |
| C | 5.815750  | 5.632476 | 6.403008 | # | 0.056  |
| C | 6.295347  | 6.572026 | 7.514655 | # | 0.006  |
| C | 7.679900  | 6.292624 | 8.076728 | # | -0.014 |
| C | 8.775521  | 5.992765 | 7.016015 | # | 0.028  |
| C | 10.066751 | 5.449419 | 7.729829 | # | -0.002 |
| C | 11.146511 | 5.102027 | 6.681083 | # | 0.051  |

|   |           |           |          |   |        |
|---|-----------|-----------|----------|---|--------|
| C | 11.533786 | 6.359948  | 5.881912 | # | 0.013  |
| C | 10.257277 | 6.912628  | 5.153179 | # | 0.021  |
| C | 9.710451  | 5.837262  | 4.205248 | # | 0.009  |
| C | 8.292850  | 6.407309  | 3.446400 | # | -0.047 |
| C | 8.275382  | 4.913202  | 6.023969 | # | -0.009 |
| C | 9.342836  | 4.567144  | 4.976707 | # | 0.021  |
| C | 10.620766 | 4.020693  | 5.718199 | # | 0.003  |
| C | 5.799295  | 9.423528  | 5.669885 | # | -0.041 |
| C | 3.544826  | 3.446400  | 5.720973 | # | -0.095 |
| C | 4.384992  | 5.943602  | 5.878304 | # | -0.063 |
| C | 3.446400  | 4.866042  | 5.520775 | # | 0.093  |
| H | 8.299229  | 8.646229  | 4.717593 | # | 0.114  |
| H | 5.779569  | 4.651381  | 6.904358 | # | 0.071  |
| H | 5.546324  | 6.813463  | 8.281020 | # | 0.129  |
| H | 9.804198  | 4.562887  | 8.320950 | # | 0.043  |
| H | 10.436615 | 6.204282  | 8.434939 | # | 0.050  |
| H | 11.942662 | 7.141248  | 6.532322 | # | 0.057  |
| H | 10.542289 | 7.814834  | 4.597555 | # | 0.056  |
| H | 8.592772  | 7.281801  | 2.867039 | # | 0.117  |
| H | 7.948891  | 4.009695  | 6.555438 | # | 0.057  |
| H | 8.977511  | 3.787262  | 4.297525 | # | 0.052  |
| H | 10.360673 | 3.098773  | 6.250499 | # | 0.056  |
| H | 6.597898  | 4.738770  | 4.561386 | # | 0.068  |
| H | 12.033530 | 4.718651  | 7.201661 | # | 0.084  |
| H | 12.305184 | 6.131804  | 5.138850 | # | 0.061  |
| H | 10.376528 | 5.645802  | 3.358224 | # | 0.101  |
| H | 7.953726  | 5.596560  | 2.800826 | # | 0.104  |
| H | 11.378981 | 3.754226  | 4.974555 | # | 0.065  |
| H | 6.264304  | 10.350951 | 5.281950 | # | 0.153  |
| H | 5.066813  | 9.762743  | 6.408951 | # | 0.115  |
| H | 2.668511  | 3.117867  | 6.332884 | # | 0.219  |
| H | 3.281496  | 2.922929  | 4.773129 | # | 0.209  |
| H | 2.510839  | 5.221303  | 5.071404 | # | 0.184  |
| H | 4.380319  | 6.666057  | 5.041927 | # | 0.126  |
| H | 3.793897  | 6.506584  | 6.643489 | # | 0.153  |
| H | 9.523645  | 8.057189  | 6.868179 | # | 0.070  |
| H | 7.564579  | 5.411323  | 8.732324 | # | 0.097  |
| H | 7.989718  | 7.101555  | 8.750145 | # | 0.085  |
| H | 7.397236  | 9.118965  | 7.130881 | # | 0.137  |
| H | 6.321948  | 7.696960  | 6.984663 | # | -0.033 |
| H | 4.466106  | 3.052140  | 6.143250 | # | 0.108  |
| H | 5.305286  | 8.939912  | 4.823670 | # | 0.062  |

58

Pentamantane "globular" C26H32

|   |          |          |          |   |        |
|---|----------|----------|----------|---|--------|
| C | 6.043062 | 3.609011 | 7.609264 | # | -0.003 |
| C | 4.197527 | 5.282589 | 7.995405 | # | -0.008 |
| C | 6.520254 | 4.391542 | 6.364536 | # | 0.053  |
| C | 4.644256 | 6.092530 | 6.756749 | # | 0.050  |
| C | 5.309951 | 5.134719 | 5.721366 | # | 0.004  |
| C | 5.765667 | 5.929460 | 4.459229 | # | 0.051  |
| C | 6.417694 | 4.960218 | 3.446400 | # | -0.008 |
| C | 4.550185 | 6.654067 | 3.837720 | # | -0.005 |
| C | 7.629684 | 4.245254 | 4.085115 | # | 0.048  |
| C | 3.911732 | 7.618111 | 4.863517 | # | 0.044  |
| C | 8.673141 | 5.298019 | 4.523067 | # | 0.001  |
| C | 4.959743 | 8.666833 | 5.299739 | # | 0.007  |
| C | 8.057840 | 6.273043 | 5.552652 | # | 0.048  |
| C | 6.181932 | 7.974541 | 5.944522 | # | 0.046  |
| C | 7.558909 | 5.472818 | 6.794814 | # | -0.006 |
| C | 5.717898 | 7.142099 | 7.179075 | # | -0.007 |
| C | 6.936081 | 6.436756 | 7.850023 | # | 0.042  |
| C | 7.159013 | 3.446400 | 5.321536 | # | -0.003 |
| C | 3.446400 | 6.814923 | 6.099034 | # | -0.001 |
| C | 6.818945 | 6.981506 | 4.924377 | # | -0.001 |
| C | 9.087939 | 7.334376 | 6.002750 | # | -0.010 |
| C | 7.242062 | 9.008840 | 6.387995 | # | -0.003 |
| C | 8.455164 | 8.299355 | 7.030272 | # | 0.054  |
| C | 5.407137 | 4.568863 | 8.639732 | # | 0.051  |
| C | 6.452467 | 5.622060 | 9.071560 | # | -0.004 |
| C | 7.983539 | 7.496089 | 8.263391 | # | -0.013 |
| H | 2.975223 | 7.486796 | 6.832911 | # | -0.010 |
| H | 5.073462 | 3.998056 | 9.518163 | # | -0.009 |
| H | 6.017457 | 6.303563 | 9.818624 | # | -0.007 |
| H | 7.313565 | 5.128343 | 9.547640 | # | -0.012 |
| H | 7.545207 | 8.173410 | 9.012266 | # | -0.012 |
| H | 8.840800 | 6.997612 | 8.741466 | # | -0.008 |
| H | 5.313280 | 2.843430 | 7.303750 | # | -0.016 |
| H | 3.437114 | 4.544718 | 7.696659 | # | -0.008 |
| H | 4.563105 | 4.383018 | 5.410708 | # | -0.030 |
| H | 5.672677 | 4.220786 | 3.114798 | # | -0.009 |
| H | 3.809714 | 5.910435 | 3.505573 | # | -0.014 |
| H | 6.735369 | 5.521045 | 2.553972 | # | -0.009 |
| H | 4.871580 | 7.210904 | 2.944200 | # | -0.014 |
| H | 8.080929 | 3.560225 | 3.353053 | # | -0.010 |
| H | 9.550286 | 4.801228 | 4.965411 | # | -0.015 |
| H | 9.029929 | 5.864507 | 3.649268 | # | -0.011 |
| H | 5.288280 | 9.258606 | 4.431537 | # | -0.016 |
| H | 8.424485 | 4.963189 | 7.253497 | # | -0.022 |
| H | 5.264349 | 7.830135 | 7.914094 | # | -0.023 |
| H | 6.425793 | 2.681985 | 5.021523 | # | -0.012 |

|   |          |          |          |   |        |
|---|----------|----------|----------|---|--------|
| H | 2.686762 | 6.074111 | 5.805916 | # | -0.011 |
| H | 8.009349 | 2.916101 | 5.777064 | # | -0.011 |
| H | 7.154021 | 7.554841 | 4.042188 | # | -0.022 |
| H | 9.963723 | 6.832951 | 6.442596 | # | -0.011 |
| H | 6.792139 | 9.712464 | 7.105268 | # | -0.009 |
| H | 9.444522 | 7.895582 | 5.125418 | # | -0.010 |
| H | 7.565739 | 9.599649 | 5.517341 | # | -0.012 |
| H | 9.198946 | 9.047445 | 7.340169 | # | -0.016 |
| H | 6.896395 | 3.078989 | 8.059587 | # | -0.012 |
| H | 3.723075 | 5.957280 | 8.724403 | # | -0.012 |
| H | 3.049953 | 8.125557 | 4.406783 | # | -0.009 |
| H | 4.515524 | 9.371249 | 6.019741 | # | -0.013 |

57

Pentamantane "globular" C26H31 +

|   |          |          |          |   |        |
|---|----------|----------|----------|---|--------|
| C | 3.446400 | 5.099179 | 5.517015 | # | 0.020  |
| C | 4.490761 | 4.079373 | 3.448582 | # | 0.000  |
| C | 4.852910 | 5.495168 | 6.003406 | # | 0.012  |
| C | 5.908793 | 4.457541 | 3.935339 | # | 0.054  |
| C | 5.913410 | 4.485887 | 5.506295 | # | -0.023 |
| C | 7.326233 | 4.864680 | 6.007210 | # | 0.014  |
| C | 7.300669 | 4.888310 | 7.650352 | # | -0.031 |
| C | 8.373130 | 3.843701 | 5.523998 | # | 0.018  |
| C | 6.268962 | 5.894774 | 7.883121 | # | 0.048  |
| C | 8.374151 | 3.843808 | 3.970369 | # | 0.032  |
| C | 6.625202 | 7.290859 | 7.648256 | # | -0.019 |
| C | 8.737360 | 5.253450 | 3.453305 | # | -0.012 |
| C | 6.635576 | 7.321991 | 6.004791 | # | 0.016  |
| C | 7.700030 | 6.293420 | 3.936460 | # | 0.064  |
| C | 5.232347 | 6.908370 | 5.503778 | # | -0.012 |
| C | 6.275026 | 5.892148 | 3.448335 | # | -0.001 |
| C | 5.214363 | 6.926691 | 3.932846 | # | 0.056  |
| C | 4.882160 | 5.504709 | 7.646726 | # | -0.018 |
| C | 6.974157 | 3.446400 | 3.452252 | # | -0.004 |
| C | 7.670848 | 6.286795 | 5.507389 | # | -0.026 |
| C | 6.997183 | 8.738075 | 5.519497 | # | 0.016  |
| C | 8.043721 | 7.720644 | 3.451180 | # | 0.003  |
| C | 6.998780 | 8.735382 | 3.965950 | # | 0.026  |
| C | 3.450113 | 5.098453 | 3.963498 | # | 0.030  |
| C | 3.807040 | 6.509598 | 3.446400 | # | 0.000  |
| C | 5.597044 | 8.344034 | 3.447559 | # | 0.001  |
| H | 3.179534 | 4.104254 | 5.897170 | # | 0.018  |
| H | 4.238202 | 3.066715 | 3.793837 | # | 0.007  |
| H | 5.656036 | 3.478495 | 5.867467 | # | 0.007  |
| H | 7.040781 | 3.884892 | 7.993767 | # | 0.065  |

|   |          |          |          |   |       |
|---|----------|----------|----------|---|-------|
| H | 8.130428 | 2.842619 | 5.904088 | # | 0.012 |
| H | 8.297006 | 5.172532 | 7.995046 | # | 0.069 |
| H | 9.367643 | 4.110784 | 5.905027 | # | 0.014 |
| H | 5.880280 | 8.012277 | 7.990176 | # | 0.065 |
| H | 7.623597 | 7.568116 | 7.992738 | # | 0.065 |
| H | 9.740015 | 5.541772 | 3.799798 | # | 0.012 |
| H | 4.487456 | 7.634642 | 5.863276 | # | 0.002 |
| H | 6.276258 | 5.891587 | 2.347691 | # | 0.003 |
| H | 4.629046 | 4.499441 | 7.989769 | # | 0.064 |
| H | 6.710310 | 2.436700 | 3.797885 | # | 0.013 |
| H | 4.142386 | 6.231366 | 7.988719 | # | 0.065 |
| H | 8.671345 | 6.568341 | 5.869690 | # | 0.009 |
| H | 2.699851 | 5.809791 | 5.895550 | # | 0.017 |
| H | 6.268281 | 9.466685 | 5.898276 | # | 0.017 |
| H | 8.071143 | 7.734433 | 2.353167 | # | 0.013 |
| H | 7.984980 | 9.028845 | 5.900677 | # | 0.017 |
| H | 9.049494 | 7.997540 | 3.798053 | # | 0.007 |
| H | 7.256064 | 9.742733 | 3.615175 | # | 0.027 |
| H | 4.478616 | 4.053047 | 2.350501 | # | 0.011 |
| H | 9.118758 | 3.117388 | 3.621260 | # | 0.025 |
| H | 8.768092 | 5.254312 | 2.355268 | # | 0.015 |
| H | 6.974688 | 3.416425 | 2.354191 | # | 0.014 |
| H | 2.449645 | 4.816782 | 3.611773 | # | 0.030 |
| H | 3.782830 | 6.524483 | 2.348319 | # | 0.009 |
| H | 3.063844 | 7.242825 | 3.790870 | # | 0.011 |
| H | 5.582307 | 8.368655 | 2.349485 | # | 0.011 |
| H | 4.845585 | 9.068738 | 3.791996 | # | 0.009 |

59

Pentamantane "globular" C26H33 +

|   |          |          |          |   |        |
|---|----------|----------|----------|---|--------|
| C | 3.446400 | 7.264140 | 7.805402 | # | -0.008 |
| C | 5.431372 | 5.998163 | 8.778726 | # | -0.049 |
| C | 4.105231 | 7.276801 | 6.410264 | # | 0.027  |
| C | 5.860326 | 5.998167 | 7.367998 | # | 0.039  |
| C | 5.761694 | 7.245948 | 6.615702 | # | -0.041 |
| C | 6.462360 | 7.269128 | 5.224942 | # | 0.063  |
| C | 6.006697 | 8.537025 | 4.459609 | # | -0.009 |
| C | 8.010117 | 7.287355 | 5.356766 | # | 0.008  |
| C | 4.480713 | 8.539749 | 4.239512 | # | 0.059  |
| C | 8.689871 | 5.998171 | 5.902514 | # | 0.037  |
| C | 4.067227 | 7.278624 | 3.446406 | # | -0.005 |
| C | 8.010119 | 4.708987 | 5.356761 | # | 0.007  |
| C | 4.469411 | 5.998173 | 4.214190 | # | 0.051  |
| C | 6.462362 | 4.727216 | 5.224936 | # | 0.063  |

|   |          |          |          |   |        |
|---|----------|----------|----------|---|--------|
| C | 3.758385 | 5.998170 | 5.606798 | # | -0.024 |
| C | 5.761695 | 4.750389 | 6.615697 | # | -0.042 |
| C | 4.105232 | 4.719535 | 6.410258 | # | 0.026  |
| C | 3.770973 | 8.549939 | 5.609176 | # | 0.014  |
| C | 8.908456 | 5.998166 | 7.433691 | # | -0.020 |
| C | 6.010984 | 5.998173 | 4.454730 | # | -0.013 |
| C | 4.067228 | 4.717726 | 3.446400 | # | -0.006 |
| C | 6.006698 | 3.459322 | 4.459598 | # | -0.010 |
| C | 4.480714 | 3.456597 | 4.239501 | # | 0.063  |
| C | 3.834285 | 5.998163 | 8.588408 | # | 0.025  |
| C | 3.446402 | 4.732191 | 7.805397 | # | -0.010 |
| C | 3.770973 | 3.446400 | 5.609165 | # | 0.017  |
| H | 6.010075 | 8.125499 | 7.219784 | # | 0.042  |
| H | 6.316292 | 9.436246 | 5.012048 | # | 0.009  |
| H | 8.315884 | 8.151093 | 5.964444 | # | 0.007  |
| H | 6.524947 | 8.567565 | 3.492308 | # | 0.016  |
| H | 8.397642 | 7.477161 | 4.345920 | # | 0.009  |
| H | 2.982193 | 7.278258 | 3.269135 | # | 0.011  |
| H | 4.550100 | 7.279954 | 2.459683 | # | 0.010  |
| H | 8.397644 | 4.519187 | 4.345913 | # | 0.009  |
| H | 4.193604 | 9.438165 | 3.679421 | # | 0.024  |
| H | 2.671037 | 5.998170 | 5.431483 | # | 0.030  |
| H | 6.010076 | 3.870836 | 7.219775 | # | 0.043  |
| H | 4.055945 | 9.439284 | 6.187274 | # | 0.015  |
| H | 9.478211 | 6.884219 | 7.737883 | # | 0.025  |
| H | 2.680667 | 8.591238 | 5.474038 | # | 0.009  |
| H | 6.509539 | 5.998176 | 3.473378 | # | 0.009  |
| H | 2.982194 | 4.718093 | 3.269130 | # | 0.012  |
| H | 6.316294 | 2.560099 | 5.012032 | # | 0.010  |
| H | 4.550101 | 4.716400 | 2.459677 | # | 0.010  |
| H | 6.524947 | 3.428787 | 3.492296 | # | 0.016  |
| H | 4.193606 | 2.558185 | 3.679405 | # | 0.021  |
| H | 2.355895 | 7.300370 | 7.682180 | # | 0.038  |
| H | 5.728921 | 5.101185 | 9.326800 | # | 0.067  |
| H | 9.705277 | 5.998173 | 5.481498 | # | 0.016  |
| H | 8.315884 | 3.845247 | 5.964434 | # | 0.008  |
| H | 9.478225 | 5.112119 | 7.737875 | # | 0.026  |
| H | 3.728405 | 8.166770 | 8.363235 | # | 0.026  |
| H | 5.728920 | 6.895140 | 9.326804 | # | 0.067  |
| H | 3.394956 | 5.998162 | 9.591925 | # | 0.059  |
| H | 3.728405 | 3.829557 | 8.363226 | # | 0.027  |
| H | 2.355896 | 4.695961 | 7.682173 | # | 0.038  |
| H | 4.055947 | 2.557052 | 6.187259 | # | 0.014  |
| H | 2.680668 | 3.405102 | 5.474027 | # | 0.008  |
| H | 7.983912 | 5.998157 | 8.023892 | # | -0.032 |

60

Pentamantane "globular" C26H34 2+

|   |          |          |          |          |
|---|----------|----------|----------|----------|
| C | 3.955897 | 7.291727 | 7.821135 | # 0.007  |
| C | 6.096671 | 6.017128 | 8.377851 | # -0.020 |
| C | 4.309043 | 7.305961 | 6.316263 | # 0.029  |
| C | 6.223781 | 6.017645 | 6.917103 | # 0.041  |
| C | 5.968577 | 7.260172 | 6.186326 | # -0.021 |
| C | 6.461752 | 7.305276 | 4.706948 | # 0.074  |
| C | 5.776918 | 8.492396 | 3.965260 | # -0.013 |
| C | 8.029705 | 7.348006 | 4.627058 | # -0.026 |
| C | 4.222589 | 8.535076 | 4.113253 | # 0.050  |
| C | 8.774438 | 6.018236 | 5.027336 | # 0.038  |
| C | 3.446486 | 7.350435 | 3.447279 | # -0.017 |
| C | 8.029659 | 4.688747 | 4.626081 | # -0.027 |
| C | 3.738172 | 6.018585 | 4.119900 | # 0.008  |
| C | 6.461697 | 4.731481 | 4.706028 | # 0.073  |
| C | 3.721136 | 6.018062 | 5.649566 | # -0.010 |
| C | 5.968568 | 4.775594 | 6.185458 | # -0.021 |
| C | 4.309021 | 4.729717 | 6.315418 | # 0.027  |
| C | 3.846737 | 8.589748 | 5.605237 | # 0.005  |
| C | 9.258103 | 6.017661 | 6.496175 | # -0.017 |
| C | 6.139428 | 6.018623 | 3.991687 | # 0.011  |
| C | 3.446400 | 4.687217 | 3.446400 | # -0.020 |
| C | 5.776814 | 3.544887 | 3.963554 | # -0.012 |
| C | 4.222479 | 3.502098 | 4.111571 | # 0.049  |
| C | 4.481783 | 6.017101 | 8.504971 | # 0.029  |
| C | 3.955913 | 4.742937 | 7.820300 | # 0.008  |
| C | 3.846678 | 3.446401 | 5.603518 | # 0.004  |
| H | 4.361599 | 8.186638 | 8.308228 | # 0.055  |
| H | 6.490057 | 6.914359 | 8.859847 | # 0.085  |
| H | 6.320508 | 8.144215 | 6.726743 | # 0.071  |
| H | 6.176579 | 9.436660 | 4.357277 | # 0.049  |
| H | 8.399690 | 8.177380 | 5.243672 | # 0.047  |
| H | 6.057452 | 8.460274 | 2.904400 | # 0.041  |
| H | 8.284161 | 7.602798 | 3.590074 | # 0.036  |
| H | 3.878104 | 9.450953 | 3.620612 | # 0.061  |
| H | 2.363698 | 7.536975 | 3.544869 | # 0.087  |
| H | 3.648444 | 7.282779 | 2.372185 | # 0.069  |
| H | 8.284085 | 4.434682 | 3.588915 | # 0.036  |
| H | 2.640455 | 6.017994 | 5.883316 | # 0.076  |
| H | 6.320539 | 3.891196 | 6.725262 | # 0.071  |
| H | 4.298491 | 9.464254 | 6.088361 | # 0.040  |
| H | 9.873019 | 6.901483 | 6.698275 | # 0.048  |
| H | 2.759485 | 8.692341 | 5.726073 | # 0.048  |
| H | 6.463715 | 6.018983 | 2.942046 | # 0.095  |
| H | 2.363615 | 4.500629 | 3.543919 | # 0.087  |

|   |          |          |          |   |        |
|---|----------|----------|----------|---|--------|
| H | 6.176468 | 2.600352 | 4.354917 | # | 0.050  |
| H | 3.648332 | 4.755567 | 2.371345 | # | 0.070  |
| H | 6.057289 | 3.577713 | 2.902701 | # | 0.040  |
| H | 3.877996 | 2.586565 | 3.618286 | # | 0.061  |
| H | 2.865409 | 7.349317 | 7.933880 | # | 0.043  |
| H | 6.490039 | 5.119535 | 8.859190 | # | 0.086  |
| H | 9.694312 | 6.018459 | 4.428823 | # | 0.044  |
| H | 8.399582 | 3.858925 | 5.242119 | # | 0.047  |
| H | 9.873263 | 5.133820 | 6.697460 | # | 0.049  |
| H | 4.258568 | 6.016740 | 9.576678 | # | 0.088  |
| H | 4.361622 | 3.847708 | 8.306804 | # | 0.053  |
| H | 2.865426 | 4.685294 | 7.933029 | # | 0.043  |
| H | 4.298440 | 2.571576 | 6.086061 | # | 0.040  |
| H | 2.759430 | 3.343755 | 5.724349 | # | 0.048  |
| H | 8.449697 | 6.017177 | 7.239452 | # | -0.036 |
| H | 4.989697 | 6.018696 | 3.797449 | # | -0.054 |

61

Pentamantane "globular" C26H35 3+

|   |          |          |          |   |        |
|---|----------|----------|----------|---|--------|
| C | 3.446400 | 8.551035 | 4.454035 | # | -0.018 |
| C | 5.628867 | 9.091749 | 5.641457 | # | -0.017 |
| C | 4.504519 | 6.260584 | 4.624068 | # | 0.008  |
| C | 6.168897 | 7.678296 | 5.831985 | # | 0.016  |
| C | 5.990820 | 6.659653 | 4.692247 | # | -0.011 |
| C | 6.808536 | 5.285652 | 4.926466 | # | 0.048  |
| C | 6.354465 | 4.232785 | 3.869861 | # | -0.012 |
| C | 8.359957 | 5.529156 | 4.941031 | # | -0.007 |
| C | 4.810992 | 4.027176 | 3.789529 | # | 0.043  |
| C | 8.851147 | 6.365051 | 6.174585 | # | 0.036  |
| C | 4.097773 | 3.446400 | 5.049017 | # | -0.024 |
| C | 8.215616 | 5.946177 | 7.548424 | # | -0.008 |
| C | 4.166317 | 4.376540 | 6.250387 | # | 0.027  |
| C | 6.662413 | 5.717521 | 7.469189 | # | 0.057  |
| C | 3.876121 | 5.886973 | 5.978250 | # | 0.002  |
| C | 5.879339 | 7.048665 | 7.175280 | # | -0.013 |
| C | 4.284227 | 6.862412 | 7.154827 | # | 0.046  |
| C | 4.133615 | 5.413118 | 3.446400 | # | 0.005  |
| C | 8.664899 | 7.837545 | 5.917286 | # | -0.008 |
| C | 6.551280 | 4.749671 | 6.316868 | # | -0.026 |
| C | 3.929457 | 3.900486 | 7.666838 | # | -0.006 |
| C | 6.069888 | 5.043296 | 8.748496 | # | -0.021 |
| C | 4.514377 | 4.889272 | 8.730941 | # | 0.062  |
| C | 4.062003 | 9.057266 | 5.739451 | # | 0.053  |
| C | 3.618799 | 8.260216 | 6.988423 | # | 0.005  |
| C | 3.859555 | 6.261586 | 8.517157 | # | -0.006 |



|   |          |           |          |   |        |
|---|----------|-----------|----------|---|--------|
| H | 3.783824 | 9.029431  | 3.528469 | # | 0.135  |
| H | 5.942896 | 9.519506  | 4.683252 | # | 0.084  |
| H | 6.304415 | 7.074249  | 3.728168 | # | 0.086  |
| H | 6.708976 | 4.531978  | 2.875496 | # | 0.072  |
| H | 8.677293 | 6.002295  | 4.002987 | # | 0.066  |
| H | 6.846560 | 3.276365  | 4.087842 | # | 0.069  |
| H | 8.841030 | 4.543889  | 4.961173 | # | 0.077  |
| H | 4.601398 | 3.357035  | 2.948066 | # | 0.110  |
| H | 3.031140 | 3.281511  | 4.817521 | # | 0.112  |
| H | 4.495095 | 2.459879  | 5.315085 | # | 0.105  |
| H | 8.679868 | 5.013259  | 7.888823 | # | 0.069  |
| H | 2.777189 | 5.915995  | 5.881532 | # | 0.084  |
| H | 6.090931 | 7.756495  | 7.985507 | # | 0.069  |
| H | 4.533533 | 5.803533  | 2.506262 | # | 0.095  |
| H | 8.998687 | 8.225787  | 4.949584 | # | 0.143  |
| H | 3.051677 | 5.284467  | 3.343548 | # | 0.079  |
| H | 7.077247 | 3.802949  | 6.504348 | # | 0.119  |
| H | 2.836950 | 3.831183  | 7.814865 | # | 0.102  |
| H | 6.331591 | 5.648026  | 9.626023 | # | 0.071  |
| H | 4.315228 | 2.881575  | 7.787981 | # | 0.093  |
| H | 6.550664 | 4.068219  | 8.899458 | # | 0.055  |
| H | 4.221496 | 4.495776  | 9.710113 | # | 0.083  |
| H | 2.364122 | 8.386453  | 4.469104 | # | 0.125  |
| H | 6.009823 | 9.738963  | 6.438448 | # | 0.091  |
| H | 9.942587 | 6.219916  | 6.255152 | # | 0.111  |
| H | 8.443887 | 6.695566  | 8.317236 | # | 0.065  |
| H | 8.858696 | 8.523008  | 6.748161 | # | 0.141  |
| H | 3.726492 | 10.101884 | 5.846953 | # | 0.119  |
| H | 3.860054 | 8.848447  | 7.881758 | # | 0.067  |
| H | 2.526918 | 8.146567  | 6.994492 | # | 0.053  |
| H | 4.146690 | 6.954315  | 9.316876 | # | 0.061  |
| H | 2.764748 | 6.182402  | 8.558240 | # | 0.059  |
| H | 7.441533 | 7.976752  | 5.801006 | # | -0.040 |
| H | 5.467778 | 4.324307  | 6.337545 | # | -0.043 |
| H | 3.860691 | 7.424715  | 4.292358 | # | -0.024 |

58

Pentamantane "planar" C<sub>26</sub>H<sub>32</sub>

|   |          |          |          |   |        |
|---|----------|----------|----------|---|--------|
| C | 5.963612 | 7.268611 | 5.240783 | # | 0.002  |
| C | 5.968810 | 4.706588 | 5.241820 | # | 0.022  |
| C | 5.965964 | 5.990698 | 6.114141 | # | 0.011  |
| C | 4.708043 | 5.990902 | 7.041893 | # | 0.043  |
| C | 3.450121 | 5.990698 | 6.114141 | # | 0.015  |
| C | 3.447275 | 4.706588 | 5.241820 | # | 0.022  |
| C | 4.708043 | 4.728527 | 4.332468 | # | 0.030  |
| C | 4.708043 | 5.991086 | 3.446400 | # | -0.009 |

|   |          |           |          |          |
|---|----------|-----------|----------|----------|
| C | 4.708043 | 7.268611  | 4.313427 | # 0.038  |
| C | 4.708043 | 8.546136  | 3.446400 | # -0.007 |
| C | 4.708043 | 9.808695  | 4.332468 | # 0.033  |
| C | 5.968810 | 9.830633  | 5.241820 | # 0.021  |
| C | 5.965964 | 8.546523  | 6.114141 | # 0.007  |
| C | 4.708043 | 8.546319  | 7.041893 | # 0.048  |
| C | 4.708043 | 7.268611  | 7.907531 | # -0.009 |
| C | 3.452473 | 7.268611  | 5.240783 | # 0.006  |
| C | 3.450121 | 8.546523  | 6.114141 | # 0.011  |
| C | 3.447275 | 9.830633  | 5.241820 | # 0.020  |
| C | 5.969686 | 3.447492  | 6.137609 | # -0.004 |
| C | 4.708043 | 11.090821 | 7.033767 | # 0.048  |
| C | 4.708043 | 4.715875  | 7.917293 | # -0.001 |
| C | 3.446400 | 3.447492  | 6.137609 | # -0.002 |
| C | 5.969686 | 11.089730 | 6.137609 | # 0.011  |
| C | 4.708043 | 9.821346  | 7.917293 | # -0.003 |
| C | 3.446400 | 11.089730 | 6.137609 | # 0.001  |
| C | 4.708043 | 3.446400  | 7.033767 | # 0.049  |
| H | 6.867754 | 5.994742  | 6.749329 | # -0.017 |
| H | 2.547057 | 4.708230  | 4.607372 | # -0.013 |
| H | 4.708043 | 3.831325  | 3.693932 | # -0.016 |
| H | 3.823386 | 8.545485  | 2.790748 | # -0.015 |
| H | 5.592699 | 8.545485  | 2.790748 | # -0.005 |
| H | 6.869029 | 9.828992  | 4.607372 | # -0.012 |
| H | 6.867754 | 8.542480  | 6.749329 | # -0.017 |
| H | 5.593049 | 7.268611  | 8.564236 | # -0.014 |
| H | 2.549861 | 7.268611  | 4.606444 | # -0.017 |
| H | 2.548332 | 8.542480  | 6.749329 | # -0.020 |
| H | 2.547057 | 9.828992  | 4.607372 | # -0.013 |
| H | 2.548332 | 5.994742  | 6.749329 | # -0.020 |
| H | 4.708043 | 10.705896 | 3.693932 | # -0.019 |
| H | 3.823037 | 7.268611  | 8.564236 | # -0.008 |
| H | 6.875741 | 3.431164  | 6.761008 | # -0.005 |
| H | 5.990274 | 2.541967  | 5.513603 | # -0.010 |
| H | 3.823356 | 4.721142  | 8.572584 | # -0.010 |
| H | 5.592730 | 4.721142  | 8.572584 | # -0.014 |
| H | 4.708043 | 2.552009  | 7.672845 | # -0.010 |
| H | 3.425811 | 2.541967  | 5.513603 | # -0.011 |
| H | 2.540344 | 3.431164  | 6.761008 | # -0.010 |
| H | 6.866225 | 7.268611  | 4.606444 | # -0.014 |
| H | 3.823386 | 5.991736  | 2.790748 | # -0.014 |
| H | 5.592699 | 5.991736  | 2.790748 | # -0.005 |
| H | 6.869029 | 4.708230  | 4.607372 | # -0.012 |
| H | 5.990274 | 11.995255 | 5.513603 | # -0.008 |
| H | 6.875741 | 11.106057 | 6.761008 | # -0.019 |
| H | 5.592730 | 9.816080  | 8.572584 | # -0.013 |
| H | 3.823356 | 9.816080  | 8.572584 | # -0.009 |
| H | 2.540344 | 11.106057 | 6.761008 | # -0.009 |

H 3.425811 11.995255 5.513603 # -0.010  
H 4.708043 11.985212 7.672845 # -0.009

57

Pentamantane "planar" C26H31 +

C 6.126089 6.022192 7.280519 # -0.006  
C 6.159361 5.976645 9.857102 # 0.046  
C 5.282615 6.023603 8.571785 # 0.001  
C 4.298864 4.820682 8.557810 # 0.031  
C 5.264939 3.464686 8.539849 # -0.037  
C 6.121787 3.451016 9.833772 # 0.038  
C 7.042280 4.698768 9.821662 # 0.035  
C 7.930153 4.680810 8.567841 # 0.007  
C 7.079921 4.677434 7.280519 # 0.009  
C 7.930153 4.680810 5.993198 # 0.005  
C 7.042280 4.698768 4.739376 # 0.034  
C 6.159361 5.976645 4.703936 # 0.038  
C 5.282615 6.023603 5.989253 # 0.004  
C 4.298864 4.820682 6.003228 # 0.031  
C 3.446400 4.808745 7.280519 # -0.016  
C 5.973945 3.700196 7.280519 # 0.019  
C 5.264939 3.464686 6.021188 # -0.034  
C 6.121787 3.451016 4.727266 # 0.042  
C 5.260310 5.974813 11.114637 # 0.001  
C 4.344722 4.726926 3.458332 # 0.056  
C 3.450117 4.760480 9.844463 # -0.002  
C 5.208872 3.446400 11.078068 # 0.001  
C 5.260310 5.974813 3.446400 # 0.001  
C 3.450117 4.760480 4.716574 # -0.006  
C 5.208872 3.446400 3.482970 # -0.010  
C 4.344722 4.726926 11.102707 # 0.055  
H 4.686119 6.948344 8.591408 # 0.027  
H 6.737268 2.540533 9.833308 # 0.014  
H 7.678860 4.679666 10.716280 # 0.020  
H 8.585232 3.799027 5.990452 # 0.025  
H 8.586977 5.560029 6.014592 # 0.020  
H 6.810003 6.862623 4.691194 # 0.002  
H 4.686119 6.948344 5.969630 # 0.029  
H 2.797442 5.695533 7.280519 # 0.036  
H 4.585002 2.607485 6.079682 # 0.045  
H 6.737268 2.540533 4.727730 # 0.014  
H 4.585002 2.607485 8.481357 # 0.045  
H 7.678860 4.679666 3.844757 # 0.020  
H 2.778264 3.936136 7.280519 # 0.022  
H 4.654239 6.890535 11.147161 # 0.012  
H 5.885164 5.974809 12.017032 # 0.019  
H 2.792304 3.881210 9.812990 # 0.015  
H 2.798364 5.645799 9.866237 # 0.024

|   |          |          |           |   |       |
|---|----------|----------|-----------|---|-------|
| H | 3.709099 | 4.725430 | 11.996400 | # | 0.022 |
| H | 5.829947 | 3.389869 | 11.980962 | # | 0.016 |
| H | 4.568762 | 2.553098 | 11.077085 | # | 0.015 |
| H | 6.842617 | 6.855500 | 7.280519  | # | 0.039 |
| H | 8.585232 | 3.799027 | 8.570585  | # | 0.025 |
| H | 8.586977 | 5.560029 | 8.546446  | # | 0.021 |
| H | 6.810003 | 6.862623 | 9.869843  | # | 0.002 |
| H | 5.885164 | 5.974809 | 2.544005  | # | 0.019 |
| H | 4.654239 | 6.890535 | 3.413878  | # | 0.013 |
| H | 2.798364 | 5.645799 | 4.694801  | # | 0.025 |
| H | 2.792304 | 3.881210 | 4.748048  | # | 0.016 |
| H | 4.568762 | 2.553098 | 3.483952  | # | 0.014 |
| H | 5.829947 | 3.389869 | 2.580076  | # | 0.021 |
| H | 3.709099 | 4.725430 | 2.564638  | # | 0.023 |

59

Pentamantane "planar" C<sub>26</sub>H<sub>33</sub> +

|   |           |          |          |   |        |
|---|-----------|----------|----------|---|--------|
| C | 7.274828  | 6.232312 | 3.464938 | # | 0.019  |
| C | 4.709934  | 6.224297 | 3.513548 | # | 0.032  |
| C | 5.990891  | 5.356465 | 3.465317 | # | 0.008  |
| C | 5.997345  | 4.310765 | 4.632213 | # | 0.048  |
| C | 5.957517  | 5.051412 | 6.007097 | # | 0.026  |
| C | 4.745096  | 6.036743 | 6.037333 | # | 0.013  |
| C | 4.752460  | 7.038240 | 4.832524 | # | 0.028  |
| C | 5.954285  | 8.026097 | 4.782795 | # | -0.006 |
| C | 7.274917  | 7.321223 | 4.534808 | # | -0.014 |
| C | 8.595457  | 8.025947 | 4.782946 | # | -0.007 |
| C | 9.797266  | 7.038256 | 4.832489 | # | 0.026  |
| C | 9.839738  | 6.224274 | 3.513489 | # | 0.028  |
| C | 8.558842  | 5.356412 | 3.465245 | # | 0.010  |
| C | 8.552354  | 4.310811 | 4.632164 | # | 0.047  |
| C | 7.274839  | 3.446400 | 4.544471 | # | -0.016 |
| C | 7.274907  | 5.721088 | 6.354148 | # | -0.017 |
| C | 8.592142  | 5.051512 | 6.007039 | # | 0.020  |
| C | 9.804650  | 6.036747 | 6.037313 | # | 0.013  |
| C | 3.446400  | 5.341213 | 3.446401 | # | -0.001 |
| C | 11.101982 | 4.359612 | 4.639268 | # | 0.038  |
| C | 4.704644  | 3.458610 | 4.544114 | # | -0.002 |
| C | 3.457026  | 5.174445 | 5.957756 | # | 0.008  |
| C | 11.103300 | 5.341208 | 3.446400 | # | 0.000  |
| C | 9.845015  | 3.458612 | 4.544151 | # | -0.002 |
| C | 11.092648 | 5.174428 | 5.957779 | # | 0.008  |
| C | 3.447703  | 4.359621 | 4.639251 | # | 0.038  |
| H | 6.000581  | 4.787940 | 2.523908 | # | 0.015  |
| H | 4.753143  | 6.601341 | 6.982072 | # | 0.006  |
| H | 3.844162  | 7.649785 | 4.915044 | # | 0.025  |

|   |           |          |          |   |        |
|---|-----------|----------|----------|---|--------|
| H | 8.531990  | 8.645307 | 5.686356 | # | 0.041  |
| H | 8.745906  | 8.721183 | 3.939356 | # | 0.061  |
| H | 9.837621  | 6.918081 | 2.658921 | # | 0.001  |
| H | 8.549090  | 4.787899 | 2.523820 | # | 0.014  |
| H | 7.274853  | 2.883704 | 3.599928 | # | 0.015  |
| H | 7.274868  | 6.210311 | 7.339691 | # | 0.078  |
| H | 8.758053  | 4.291947 | 6.791346 | # | 0.028  |
| H | 9.796556  | 6.601416 | 6.982013 | # | 0.005  |
| H | 5.791570  | 4.291855 | 6.791392 | # | 0.027  |
| H | 10.705639 | 7.649700 | 4.914927 | # | 0.026  |
| H | 7.274912  | 2.701457 | 5.354751 | # | 0.003  |
| H | 3.426039  | 4.789671 | 2.496822 | # | 0.011  |
| H | 2.548059  | 5.972244 | 3.469653 | # | 0.015  |
| H | 4.707057  | 2.715043 | 5.354012 | # | 0.003  |
| H | 4.693027  | 2.899569 | 3.598180 | # | 0.010  |
| H | 2.547825  | 3.733067 | 4.606159 | # | 0.021  |
| H | 2.568509  | 5.817186 | 6.005958 | # | 0.017  |
| H | 3.412722  | 4.502788 | 6.825547 | # | 0.011  |
| H | 7.274853  | 6.820085 | 2.525803 | # | 0.042  |
| H | 6.017650  | 8.645470 | 5.686198 | # | 0.040  |
| H | 5.803652  | 8.721112 | 3.939113 | # | 0.061  |
| H | 4.712048  | 6.918102 | 2.658968 | # | 0.001  |
| H | 12.001632 | 5.972250 | 3.469690 | # | 0.015  |
| H | 11.123710 | 4.789630 | 2.496846 | # | 0.011  |
| H | 9.856606  | 2.899530 | 3.598246 | # | 0.011  |
| H | 9.842587  | 2.715096 | 5.354094 | # | 0.004  |
| H | 11.136925 | 4.502735 | 6.825545 | # | 0.011  |
| H | 11.981179 | 5.817148 | 6.006014 | # | 0.017  |
| H | 12.001864 | 3.733072 | 4.606128 | # | 0.023  |
| H | 7.274373  | 6.697880 | 5.695411 | # | -0.043 |

60

Pentamantane "planar" C<sub>26</sub>H<sub>34</sub> 2+

|   |          |          |          |   |        |
|---|----------|----------|----------|---|--------|
| C | 7.273917 | 6.022206 | 6.379520 | # | 0.013  |
| C | 9.850663 | 5.986788 | 6.406733 | # | 0.035  |
| C | 8.555724 | 5.143924 | 6.276055 | # | 0.022  |
| C | 8.572180 | 4.390725 | 4.906723 | # | 0.049  |
| C | 8.603284 | 5.469123 | 3.771973 | # | 0.007  |
| C | 9.847318 | 6.402302 | 3.865730 | # | 0.037  |
| C | 9.873813 | 7.056776 | 5.279459 | # | 0.024  |
| C | 8.616548 | 7.942910 | 5.413289 | # | -0.002 |
| C | 7.321758 | 7.106240 | 5.247285 | # | 0.042  |
| C | 6.109480 | 8.069510 | 5.277774 | # | -0.001 |
| C | 4.798462 | 7.392787 | 4.961767 | # | 0.007  |
| C | 4.709145 | 5.687405 | 6.683353 | # | 0.003  |
| C | 6.038717 | 5.074016 | 6.276587 | # | 0.001  |

|   |           |          |          |   |        |
|---|-----------|----------|----------|---|--------|
| C | 6.010163  | 4.394610 | 4.866178 | # | 0.046  |
| C | 7.290792  | 3.538718 | 4.742413 | # | -0.015 |
| C | 7.323383  | 6.346375 | 3.885005 | # | 0.008  |
| C | 6.031163  | 5.501439 | 3.765727 | # | 0.026  |
| C | 4.751605  | 6.388662 | 3.821804 | # | 0.019  |
| C | 11.091526 | 5.059522 | 6.402180 | # | -0.011 |
| C | 3.478315  | 4.392041 | 4.887097 | # | 0.052  |
| C | 9.806061  | 3.446400 | 4.856343 | # | -0.018 |
| C | 11.155951 | 5.757235 | 3.446400 | # | -0.012 |
| C | 3.446400  | 4.926857 | 6.341687 | # | -0.006 |
| C | 4.742729  | 3.525285 | 4.704513 | # | 0.000  |
| C | 3.455891  | 5.528076 | 3.831317 | # | -0.001 |
| C | 11.097060 | 4.076648 | 5.274809 | # | 0.027  |
| H | 8.526805  | 4.402862 | 7.090572 | # | -0.001 |
| H | 9.706314  | 7.211854 | 3.128488 | # | 0.043  |
| H | 10.769915 | 7.683244 | 5.383792 | # | 0.026  |
| H | 6.249040  | 8.844587 | 4.503706 | # | 0.070  |
| H | 6.050524  | 8.612799 | 6.229696 | # | 0.056  |
| H | 4.717064  | 6.189072 | 7.660354 | # | 0.108  |
| H | 6.179258  | 4.273250 | 7.028043 | # | 0.046  |
| H | 7.270878  | 2.747449 | 5.506872 | # | 0.015  |
| H | 7.343851  | 7.083093 | 3.067021 | # | 0.003  |
| H | 6.027560  | 4.994817 | 2.790117 | # | 0.023  |
| H | 4.732502  | 7.019142 | 2.914406 | # | 0.061  |
| H | 8.597997  | 4.959370 | 2.796534 | # | 0.017  |
| H | 3.906953  | 8.028104 | 5.042855 | # | 0.115  |
| H | 7.300944  | 3.034144 | 3.765811 | # | 0.030  |
| H | 11.086469 | 4.430901 | 7.314740 | # | 0.100  |
| H | 12.032933 | 5.619239 | 6.451771 | # | 0.073  |
| H | 9.902152  | 2.945085 | 3.885278 | # | 0.067  |
| H | 9.658190  | 2.625527 | 5.587086 | # | 0.089  |
| H | 12.006952 | 3.481311 | 5.136586 | # | 0.147  |
| H | 12.034688 | 6.402135 | 3.550441 | # | 0.107  |
| H | 11.130226 | 5.251811 | 2.475357 | # | 0.102  |
| H | 7.270089  | 6.525826 | 7.358456 | # | 0.015  |
| H | 8.642603  | 8.734002 | 4.651332 | # | 0.024  |
| H | 8.611454  | 8.445986 | 6.389723 | # | 0.025  |
| H | 9.845906  | 6.512885 | 7.370034 | # | 0.039  |
| H | 2.558547  | 5.540206 | 6.535740 | # | 0.059  |
| H | 3.387950  | 4.081691 | 7.048840 | # | 0.078  |
| H | 4.749887  | 2.705314 | 5.436193 | # | 0.014  |
| H | 4.743685  | 3.060658 | 3.709944 | # | 0.034  |
| H | 3.343538  | 5.074085 | 2.839756 | # | 0.049  |
| H | 2.576573  | 6.169713 | 3.976312 | # | 0.029  |
| H | 2.584404  | 3.776116 | 4.738541 | # | 0.055  |
| H | 4.562576  | 6.748878 | 6.019740 | # | -0.035 |
| H | 11.459288 | 4.863514 | 4.153009 | # | -0.033 |

61

Pentamantane "planar" C<sub>26</sub>H<sub>35</sub> 3+

|   |           |          |          |          |
|---|-----------|----------|----------|----------|
| C | 7.251437  | 4.912105 | 3.446400 | # -0.037 |
| C | 10.771279 | 5.147798 | 3.846652 | # 0.032  |
| C | 10.331153 | 6.624842 | 3.774460 | # -0.066 |
| C | 9.494164  | 7.250255 | 4.725815 | # 0.026  |
| C | 9.252188  | 6.585386 | 6.068165 | # 0.019  |
| C | 10.188737 | 5.341827 | 6.274204 | # 0.017  |
| C | 10.170507 | 4.377012 | 5.056375 | # 0.021  |
| C | 8.868111  | 3.446400 | 4.805413 | # -0.064 |
| C | 7.515428  | 3.997029 | 4.590225 | # 0.060  |
| C | 6.348544  | 3.492787 | 5.370622 | # -0.057 |
| C | 5.102683  | 4.428814 | 5.439476 | # 0.030  |
| C | 4.727424  | 4.920062 | 4.022666 | # 0.013  |
| C | 6.004408  | 5.817394 | 3.547357 | # -0.005 |
| C | 5.961610  | 6.900152 | 4.564646 | # 0.030  |
| C | 8.912876  | 8.605598 | 4.453906 | # -0.056 |
| C | 7.784879  | 6.104520 | 6.415597 | # 0.015  |
| C | 6.447941  | 6.721066 | 5.942275 | # -0.028 |
| C | 5.205585  | 5.653695 | 6.400744 | # -0.018 |
| C | 12.317609 | 5.225582 | 4.091602 | # 0.019  |
| C | 3.585638  | 6.946127 | 4.962403 | # 0.040  |
| C | 11.700415 | 7.488024 | 4.672219 | # -0.064 |
| C | 11.684373 | 5.749756 | 6.512779 | # -0.001 |
| C | 3.446401  | 5.763191 | 3.998318 | # 0.001  |
| C | 4.867837  | 7.857612 | 4.413875 | # -0.039 |
| C | 3.905133  | 6.477445 | 6.388741 | # 0.003  |
| C | 12.395026 | 6.260064 | 5.232173 | # 0.042  |
| H | 10.357024 | 7.068566 | 2.779635 | # 0.105  |
| H | 9.855194  | 4.824274 | 7.182730 | # 0.048  |
| H | 10.884915 | 3.579998 | 5.292074 | # 0.078  |
| H | 6.655432  | 3.117569 | 6.353868 | # 0.105  |
| H | 6.038054  | 2.573397 | 4.822764 | # 0.147  |
| H | 4.653661  | 4.089406 | 3.309530 | # 0.072  |
| H | 5.772607  | 6.210908 | 2.553817 | # 0.097  |
| H | 9.447110  | 9.136801 | 3.660623 | # 0.102  |
| H | 6.261969  | 7.632423 | 6.515747 | # 0.081  |
| H | 5.484012  | 5.351847 | 7.417615 | # 0.093  |
| H | 9.507383  | 7.340719 | 6.825915 | # 0.072  |
| H | 4.282691  | 3.809631 | 5.827031 | # 0.092  |
| H | 8.882178  | 9.234009 | 5.350049 | # 0.101  |
| H | 12.836966 | 5.584207 | 3.195774 | # 0.062  |
| H | 12.745806 | 4.253350 | 4.350379 | # 0.068  |
| H | 11.416832 | 8.247095 | 5.404556 | # 0.098  |
| H | 12.158250 | 7.972514 | 3.806167 | # 0.130  |

|   |           |          |          |   |        |
|---|-----------|----------|----------|---|--------|
| H | 13.434230 | 6.531637 | 5.470075 | # | 0.113  |
| H | 12.226431 | 4.877065 | 6.893495 | # | 0.069  |
| H | 11.727921 | 6.509091 | 7.303663 | # | 0.053  |
| H | 7.076869  | 4.226077 | 2.589858 | # | 0.142  |
| H | 8.845675  | 2.708630 | 5.612750 | # | 0.094  |
| H | 9.129439  | 2.905068 | 3.875575 | # | 0.129  |
| H | 10.555272 | 4.657103 | 2.891088 | # | 0.058  |
| H | 2.592690  | 5.141066 | 4.300352 | # | 0.095  |
| H | 3.224458  | 6.099946 | 2.979388 | # | 0.070  |
| H | 4.634104  | 8.135090 | 3.384422 | # | 0.101  |
| H | 4.941438  | 8.740572 | 5.050907 | # | 0.101  |
| H | 3.982252  | 7.321777 | 7.082617 | # | 0.064  |
| H | 3.073188  | 5.863106 | 6.760582 | # | 0.097  |
| H | 2.725599  | 7.621588 | 4.928601 | # | 0.113  |
| H | 7.875280  | 8.501926 | 4.102842 | # | 0.065  |
| H | 7.782209  | 5.033103 | 6.227237 | # | -0.007 |
| H | 7.736310  | 6.156187 | 7.510692 | # | 0.086  |
| H | 8.147524  | 5.464331 | 3.15454  | # | 0.078  |



## References

1. G. A. Olah and J. Lukas, *J Am Chem Soc*, 1968, **90**, 933-&.
2. R. H. Boyd, S. N. Sanwal, Sharyteh.S and D. Mcnally, *J Phys Chem-Us*, 1971, **75**, 1264-&.
3. Y. Li and T. Baer, *J Phys Chem A*, 2002, **106**, 272-278.
4. J. L. Abboud, O. Castano, J. Z. Davalos, P. Jimenez, R. Gomperts, P. Muller and M. V. Roux, *J Org Chem*, 2002, **67**, 1057-1060.
5. J. Z. Davalos, R. Herrero, E. Quintanilla, P. Jimenez, J. F. Gal, P. C. Maria and J. L. M. Abboud, *Chem-Eur J*, 2006, **12**, 5505-5513.
6. P. M. Esteves, G. G. P. Alberto, A. Ramirez-Solis and C. J. A. Mota, *J Phys Chem A*, 2001, **105**, 4308-4311.
7. I. Santos, D. W. Balogh, C. W. Doecke, A. G. Marshall and L. A. Paquette, *J Am Chem Soc*, 1986, **108**, 8183-8185.
8. Z. F. Chen, H. J. Jiao, D. Moran, A. Hirsch, W. Thiel and P. V. Schleyer, *J Phys Chem A*, 2003, **107**, 2075-2079.
9. P. Ausloos, R. E. Rebbert, F. P. Schwarz and S. G. Lias, *Radiat Phys Chem*, 1983, **21**, 27-43.
10. M. W. Lodewyk, M. R. Siebert and D. J. Tantillo, *Chemical Reviews*, 2012, **112**, 1839-1862.
11. A. D. M. a. A. W. Blackwell, *IUPAC. Compendium of Chemical Terminology*, Blackwell Scientific Publications,, Oxford, 1997.
